# Supplementary material for: Computational comparison of Ru(bda)(py)2 and Fe(bda)(py)2 as water oxidation catalysts
Source: Royal Society of Chemistry journal article supplement (doi:10.1039/d2dt01150f), 2022-01-01
Supplement: d2dt01150f1.pdf [file d2dt01150f1.pdf]

Supporting information

## **Computational comparison of Ru(bda)(py)<sub>2</sub> and Fe(bda)(py)<sub>2</sub> as water oxidation catalysts**

Ge Li, Mårten S. G. Ahlquist\*

Department of Theoretical Chemistry & Biology, School of Engineering Sciences in Chemistry Biotechnology and Health, KTH Royal Institute of Technology, 10691 Stockholm, Sweden

\*Corresponding Author: Mårten S. G. Ahlquist [ahlqui@kth.se](mailto:ahlqui@kth.se)

Table S1. The energy differences in kcal/mol of all species among different multiplicities

|                                                                         | Multiplicity | B3LYP-D3<br>LACV3P****<br>Energy difference | B3LYP*-D3<br>LACV3P****<br>Energy difference | M06-L<br>LACV3P****<br>Energy difference |
|-------------------------------------------------------------------------|--------------|---------------------------------------------|----------------------------------------------|------------------------------------------|
| Ru <sup>II</sup> (bda)(py) <sub>2</sub>                                 | 1            | 0.00                                        | 0.00                                         | 0.00                                     |
| Ru <sup>II</sup> (bda)(py) <sub>2</sub>                                 | 3            | 17.31                                       | 19.93                                        | 14.60                                    |
| Ru <sup>II</sup> (bda)(py) <sub>2</sub>                                 | 5            | 38.72                                       | 44.26                                        | 30.35                                    |
| Ru <sup>III</sup> (bda)(py) <sub>2</sub> -H <sub>2</sub> O <sup>+</sup> | 2            | 0.00                                        | 0.00                                         | 0.00                                     |
| Ru <sup>III</sup> (bda)(py) <sub>2</sub> -H <sub>2</sub> O <sup>+</sup> | 4            | 21.06                                       | 23.51                                        | 17.47                                    |
| Ru <sup>III</sup> (bda)(py) <sub>2</sub> -H <sub>2</sub> O <sup>+</sup> | 6            | 45.96                                       | 50.71                                        | 39.10                                    |
| Ru <sup>IV</sup> (bda)(py) <sub>2</sub> -OH <sup>+</sup>                | 1            | 0.00                                        | 0.00                                         | 0.00                                     |
| Ru <sup>IV</sup> (bda)(py) <sub>2</sub> -OH <sup>+</sup>                | 3            | 8.09                                        | 9.87                                         | 10.35                                    |
| Ru <sup>IV</sup> (bda)(py) <sub>2</sub> -OH <sup>+</sup>                | 5            | 38.31                                       | 41.37                                        | 35.48                                    |
| Ru <sup>V</sup> (bda)(py) <sub>2</sub> -O <sup>+</sup>                  | 2            | 0.00                                        | 0.00                                         | 0.00                                     |
| Ru <sup>V</sup> (bda)(py) <sub>2</sub> -O <sup>+</sup>                  | 4            | 10.50                                       | 12.27                                        | 12.14                                    |

  

|                                                                         | Multiplicity | B3LYP-D3<br>LACV3P****<br>Energy difference | B3LYP*-D3<br>LACV3P****<br>Energy difference | M06-L<br>LACV3P****<br>Energy difference |
|-------------------------------------------------------------------------|--------------|---------------------------------------------|----------------------------------------------|------------------------------------------|
| Fe <sup>II</sup> (bda)(py) <sub>2</sub>                                 | 1            | 14.97                                       | 8.73                                         | 8.14                                     |
| Fe <sup>II</sup> (bda)(py) <sub>2</sub>                                 | 3            | 17.38                                       | 17.44                                        | 14.28                                    |
| Fe <sup>II</sup> (bda)(py) <sub>2</sub>                                 | 5            | 0.00                                        | 0.00                                         | 0.00                                     |
| Fe <sup>III</sup> (bda)(py) <sub>2</sub> -H <sub>2</sub> O <sup>+</sup> | 2            | 26.35                                       | 25.54                                        | 21.37                                    |
| Fe <sup>III</sup> (bda)(py) <sub>2</sub> -H <sub>2</sub> O <sup>+</sup> | 4            | 14.38                                       | 13.89                                        | 11.60                                    |
| Fe <sup>III</sup> (bda)(py) <sub>2</sub> -H <sub>2</sub> O <sup>+</sup> | 6            | 0.00                                        | 0.00                                         | 0.00                                     |
| Fe <sup>IV</sup> (bda)(py) <sub>2</sub> -OH <sup>+</sup>                | 1            | 21.22                                       | 20.01                                        | 16.04                                    |
| Fe <sup>IV</sup> (bda)(py) <sub>2</sub> -OH <sup>+</sup>                | 3            | 3.88                                        | 5.44                                         | 1.20                                     |
| Fe <sup>IV</sup> (bda)(py) <sub>2</sub> -OH <sup>+</sup>                | 5            | 0.00                                        | 0.00                                         | 0.00                                     |
| Fe <sup>V</sup> (bda)(py) <sub>2</sub> -O <sup>+</sup>                  | 2            | 14.21                                       | 11.35                                        | 12.07                                    |
| Fe <sup>V</sup> (bda)(py) <sub>2</sub> -O <sup>+</sup>                  | 4            | 0.00                                        | 0.00                                         | 0.00                                     |

Table S2. Spin density contributions of different atoms from different orbitals

|                                                                           | O1                                          | M2                                                                                                                       | O3                                             | O4                                             | N7              |
|---------------------------------------------------------------------------|---------------------------------------------|--------------------------------------------------------------------------------------------------------------------------|------------------------------------------------|------------------------------------------------|-----------------|
| [Ru <sup>V</sup> (bda)(py) <sub>2</sub> -O] <sup>+</sup>                  | 0.18582 2px,<br>0.09188 2py,<br>0.50144 2pz | 0.06872 4dxz,<br>0.15194 4dyz,<br>0.05924 4dx <sup>2</sup> y <sup>2</sup>                                                | /                                              | /                                              | -0.01592 2px    |
| [Fe <sup>V</sup> (bda)(py) <sub>2</sub> -O] <sup>+</sup>                  | 0.34437 2px,<br>0.07189 2py,<br>0.63047 2pz | 0.33035 3dxy,<br>0.27140 3dxz,<br>0.30380 3dyz,<br>0.40192 3dx <sup>2</sup> y <sup>2</sup> ,<br>0.60219 3dz <sup>2</sup> | -0.01522 2py,<br>0.02607 2pz                   | -0.02301 2px,<br>0.03056 2pz                   | /               |
| 6- coordinate<br>[Fe <sup>V</sup> (bda)(py) <sub>2</sub> -O] <sup>+</sup> | 0.21543 2px,<br>0.38521 2py,<br>0.41354 2pz | 0.15825 3dxy,<br>0.08868 3dxz,<br>0.09652 3dyz,<br>0.35535 3dx <sup>2</sup> y <sup>2</sup> ,<br>0.29346 3dz <sup>2</sup> | /                                              | -0.48617 2px,<br>-0.01747 2py,<br>-0.02822 2pz | /               |
|                                                                           | N8                                          | O5                                                                                                                       | O6                                             | N9 in pyridine                                 | N10 in pyridine |
| [Ru <sup>V</sup> (bda)(py) <sub>2</sub> -O] <sup>+</sup>                  | -0.01944 2py                                | /                                                                                                                        | /                                              | /                                              | /               |
| [Fe <sup>V</sup> (bda)(py) <sub>2</sub> -O] <sup>+</sup>                  | 0.01088 2py                                 | -0.02980 2px,<br>0.02596 2pz                                                                                             | -0.03175 2py,<br>0.02839 2pz                   | -0.01532 2pz                                   | -0.01456 2pz    |
| 6- coordinate<br>[Fe <sup>V</sup> (bda)(py) <sub>2</sub> -O] <sup>+</sup> | /                                           | /                                                                                                                        | -0.06195 2px,<br>-0.13984 2py,<br>-0.29028 2pz | /                                              | /               |

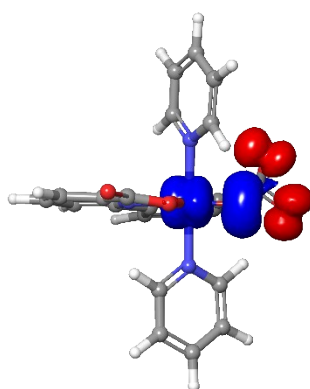

Figure S1 Spin density distribution of degenerated 6-coordinate [Fe<sup>V</sup>(bda)(py)<sub>2</sub>-O]<sup>+</sup> at doublet state at an isovalue of 0.005 electrons/bohr<sup>3</sup>

Energy profile of radical coupling of [RuV(bda)(py)<sub>2</sub>]<sup>+</sup> from different orientations

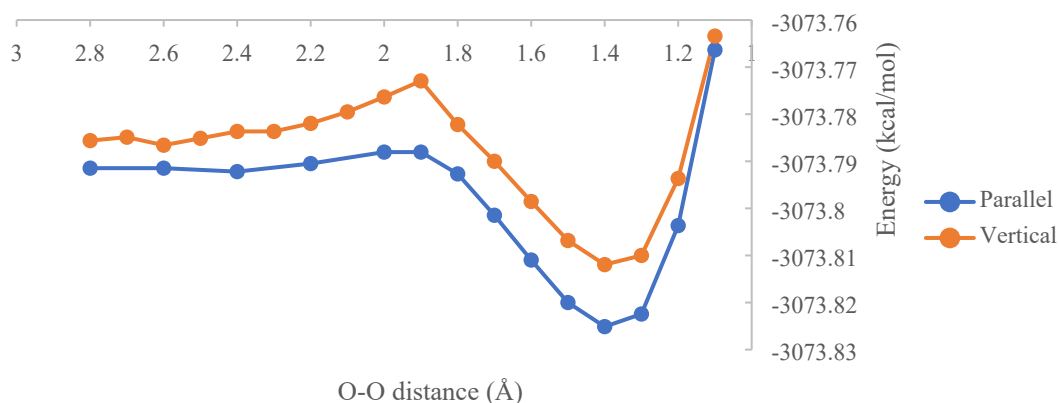

Energy profile of radical coupling of [FeV(bda)(py)<sub>2</sub>]<sup>+</sup> from different orientations

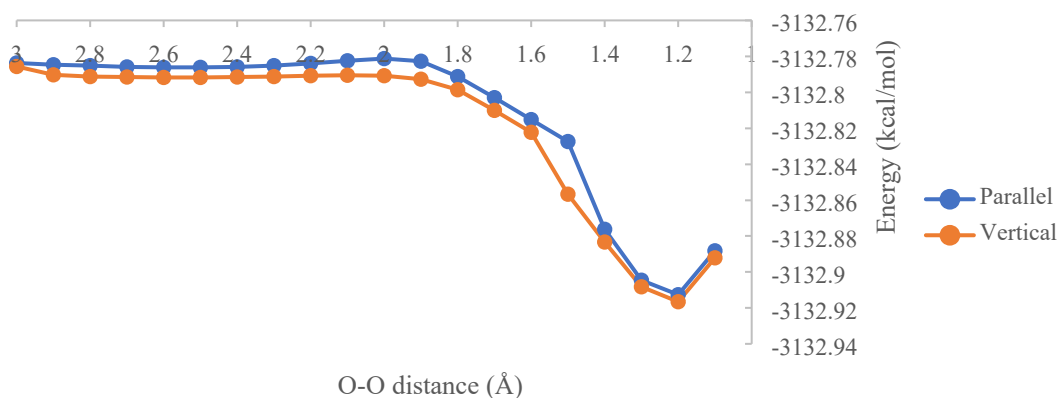

Energy profile of radical coupling of 6-coordinate [FeV(bda)(py)<sub>2</sub>]<sup>+</sup> from different orientations

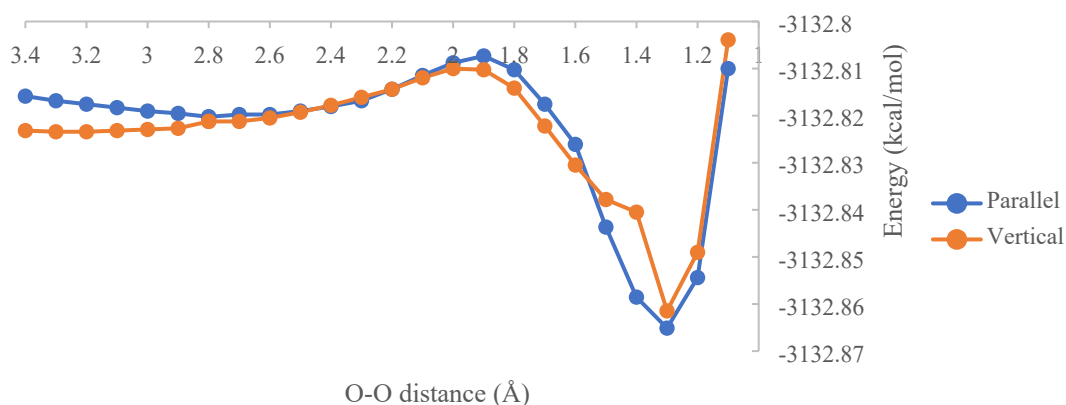

Figure S2 Energy profiles of vertical and parallel radical coupling

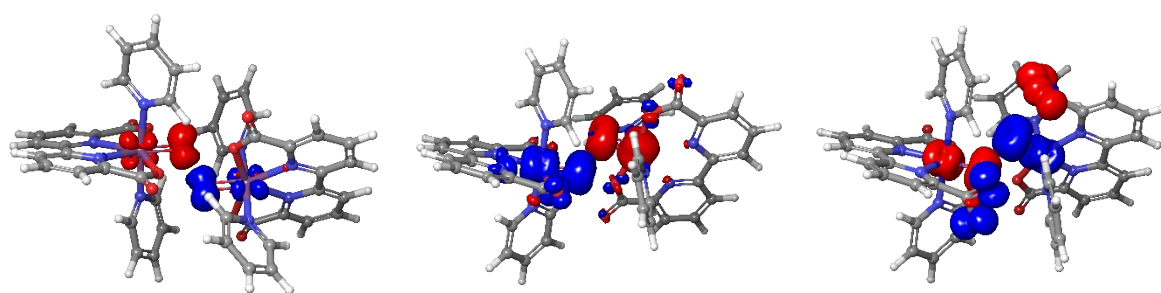

Figure S3 Spin density distributions of transition state structures of  $[\text{Ru}^{\text{V}}(\text{bda})(\text{py})_2\text{-O}]^+$  dimer (left),  $[\text{Fe}^{\text{V}}(\text{bda})(\text{py})_2\text{-O}]^+$  dimer (middle) and 6-coordinate  $[\text{Fe}^{\text{V}}(\text{bda})(\text{py})_2\text{-O}]^+$  dimer (right) at an isovalue of 0.005 electrons/bohr<sup>3</sup>

XYZ coordinates

Ru<sup>II</sup>(bda)(py)<sub>2</sub>—Singlet

E (B3LYP-D3/LACV3P<sup>\*\*\*</sup>) (a.u.) = -1462.326276

G<sub>solv</sub> (kcal/mol) = -31.361

ZPE (kcal/mol) = 218.704

ΔH<sub>298</sub> (kcal/mol) = 16.363

ΔS<sub>298</sub> (cal/(K•mol)) = 173.692

XYZ coordinate

|     |               |               |               |
|-----|---------------|---------------|---------------|
| Ru2 | -4.4001485345 | 9.6992911356  | 1.5754219261  |
| C3  | -8.3671666567 | 11.7399107655 | 0.0860503847  |
| C4  | -8.0901905657 | 10.4200859908 | -0.2903218095 |
| C5  | -6.9121142395 | 9.8313068764  | 0.1566487413  |
| N6  | -6.0715798139 | 10.5296603604 | 0.9342457320  |
| C7  | -6.3002946412 | 11.8211743809 | 1.3219608684  |
| C8  | -7.4715945355 | 12.4496292762 | 0.8942171144  |
| H9  | -9.2801960695 | 12.2215569679 | -0.2503530765 |
| H10 | -8.7514644491 | 9.8334567041  | -0.9183258401 |
| H11 | -7.6801168438 | 13.4740727253 | 1.1843057216  |
| C12 | -2.9666995951 | 13.0419293113 | 3.6643269905  |
| C13 | -5.2126984333 | 12.3782005838 | 2.1539260791  |
| N14 | -4.2046874913 | 11.4847978898 | 2.3887617925  |
| C15 | -3.1107092856 | 11.7754455373 | 3.1088459927  |
| H16 | -2.0738202335 | 13.2500801644 | 4.2432812602  |
| C17 | -6.4348832426 | 8.4041878864  | -0.1672126507 |
| O18 | -7.1686317668 | 7.7139982512  | -0.8702430244 |
| C19 | -2.1139480396 | 10.6092664315 | 3.2435176701  |
| O20 | -1.0891474581 | 10.8201328389 | 3.8866704468  |
| O21 | -5.2919480755 | 8.0773022114  | 0.3553943639  |
| O22 | -2.4718233625 | 9.5122620158  | 2.6483170930  |
| N23 | -5.3497442185 | 8.8530664523  | 3.2778528207  |
| C24 | -5.8139681663 | 7.5863522705  | 3.1958719824  |
| C25 | -6.3653861797 | 6.9276714071  | 4.2894212959  |
| H26 | -5.7275500775 | 7.1218899682  | 2.2196925789  |
| H27 | -6.7219380635 | 5.9102396029  | 4.1688698991  |
| N28 | -3.2941079358 | 10.2501235393 | -0.1465362496 |
| C29 | -3.8268861287 | 10.9004064788 | -1.2009083323 |
| C30 | -3.1152154084 | 11.1417854090 | -2.3696579240 |
| H31 | -4.8556921541 | 11.2226814205 | -1.1001263955 |
| H32 | -3.5952698582 | 11.6668918296 | -3.1887823542 |
| C33 | -3.9777183574 | 13.9878004486 | 3.4535348623  |
| H34 | -3.8885194517 | 14.9831306225 | 3.8779033613  |
| C35 | -5.1077594368 | 13.6610186390 | 2.6956758319  |
| H36 | -5.8926084921 | 14.3912611457 | 2.5287287660  |
| C37 | -6.4451296133 | 7.5853377557  | 5.5153655667  |
| H38 | -6.8696448317 | 7.0923931572  | 6.3848299454  |
| C39 | -5.9624640570 | 8.8902760199  | 5.6006789515  |
| H40 | -5.9937539491 | 9.4463134136  | 6.5317719794  |
| C41 | -5.4236023728 | 9.4857945201  | 4.4666180694  |
| H42 | -5.0295772794 | 10.4934641127 | 4.5028595102  |
| C43 | -1.7986235897 | 10.6937045886 | -2.4640429076 |
| H44 | -1.2188604429 | 10.8616530995 | -3.3666962026 |
| C45 | -1.2450410151 | 10.0243719602 | -1.3741651277 |
| H46 | -0.2250181836 | 9.6558871193  | -1.3955916174 |
| C47 | -2.0156178149 | 9.8215671477  | -0.2344296516 |
| H48 | -1.6306367218 | 9.3217787951  | 0.6476844713  |

[Ru<sup>III</sup>(bda)(py)<sub>2</sub>-H<sub>2</sub>O]<sup>+</sup>—Doublet

E (B3LYP-D3/LACV3P<sup>\*\*\*</sup>) (a.u.) = -1538.585679

G<sub>solv</sub> (kcal/mol) = -58.152

ZPE (kcal/mol) = 235.541

ΔH<sub>298</sub> (kcal/mol) = 18.129

ΔS<sub>298</sub> (cal/(K•mol)) = 185.379

XYZ coordinate

|     |               |               |               |
|-----|---------------|---------------|---------------|
| O1  | -2.9983157188 | 7.5768373103  | 1.1119947608  |
| Ru2 | -4.3848560152 | 9.6281051969  | 1.5327514221  |
| C3  | -8.4183275947 | 11.7823302687 | 0.0695128436  |
| C4  | -8.1463153123 | 10.4699672518 | -0.3195299577 |
| C5  | -6.9662562243 | 9.8781200161  | 0.1181384872  |
| N6  | -6.1101910298 | 10.5466171305 | 0.9031694089  |
| C7  | -6.3424932623 | 11.8280141724 | 1.2896901627  |
| C8  | -7.5094278659 | 12.4721488442 | 0.8772652409  |
| H9  | -9.3298522369 | 12.2727658308 | -0.2564093688 |
| H10 | -8.8070143880 | 9.8875784822  | -0.9523616918 |
| H11 | -7.7053247580 | 13.4943466444 | 1.1791723203  |
| C12 | -3.0425492114 | 13.0870314627 | 3.6253071700  |
| C13 | -5.2616374779 | 12.3835183145 | 2.1158406272  |
| N14 | -4.2687485534 | 11.4916589585 | 2.3623128888  |
| C15 | -3.1904145107 | 11.8119359756 | 3.0909179795  |
| H16 | -2.1539100334 | 13.2978548520 | 4.2101364885  |
| C17 | -6.5158178972 | 8.4751007169  | -0.2458766472 |
| O18 | -7.2253831647 | 7.7625256864  | -0.9318577489 |
| C19 | -2.2187546822 | 10.6629243920 | 3.2961349165  |
| O20 | -1.2014943491 | 10.8297051983 | 3.9424512585  |
| O21 | -5.3476521524 | 8.1728088916  | 0.2646323514  |
| O22 | -2.6256117203 | 9.5516277480  | 2.7340805033  |
| N23 | -5.4049074496 | 8.7706602395  | 3.2195699037  |
| C24 | -6.1363438998 | 7.6432556422  | 3.0805221450  |
| C25 | -6.7609222518 | 7.0257380353  | 4.1581849488  |
| H26 | -6.2006943757 | 7.2371205926  | 2.0794020417  |
| H27 | -7.3359757313 | 6.1216054735  | 3.9905608756  |
| N28 | -3.2525054045 | 10.3334476224 | -0.1254919428 |
| C29 | -3.8051536077 | 10.9521197355 | -1.1893846491 |
| C30 | -3.0553267295 | 11.3666807509 | -2.2818330897 |
| H31 | -4.8754667072 | 11.1095409028 | -1.1618397618 |
| H32 | -3.5488808561 | 11.8566549001 | -3.1140217220 |
| C33 | -4.0456478162 | 14.0282469002 | 3.3888436995  |
| H34 | -3.9622601472 | 15.0322332665 | 3.7922037608  |
| C35 | -5.1663427336 | 13.6760511398 | 2.6319125993  |
| H36 | -5.9535394340 | 14.3972036855 | 2.4448585593  |
| C37 | -6.6298515810 | 7.5796752718  | 5.4301966244  |
| H38 | -7.1060416158 | 7.1176652544  | 6.2892493977  |
| C39 | -5.8675740328 | 8.7378866494  | 5.5759999727  |
| H40 | -5.7258825775 | 9.2044928072  | 6.5447364854  |
| C41 | -5.2713351552 | 9.2990282574  | 4.4540178825  |
| H42 | -4.6652717880 | 10.1900659417 | 4.5421503756  |
| C43 | -1.6797492204 | 11.1360490476 | -2.2839294277 |
| H44 | -1.0675908166 | 11.4483337899 | -3.1241366956 |
| C45 | -1.1099522661 | 10.4920229384 | -1.1880182739 |
| H46 | -0.0465397094 | 10.2844121572 | -1.1432660336 |
| C47 | -1.9220391496 | 10.1011831057 | -0.1293862867 |
| H48 | -1.5266356938 | 9.5845835143  | 0.7344335865  |
| H49 | -2.6950744007 | 7.2478975363  | 1.9690466960  |
| H50 | -3.6556026933 | 6.9607763525  | 0.7558394524  |

[Ru<sup>IV</sup>(bda)(py)<sub>2</sub>-OH]<sup>+</sup>—Singlet  
E (B3LYP-D3/LACV3P<sup>\*\*\*</sup>) (a.u.) = -1537.937692

G<sub>solv</sub> (kcal/mol) = -61.072

ZPE (kcal/mol) = 229.141

ΔH<sub>298</sub> (kcal/mol) = 17.272

ΔS<sub>298</sub> (cal/(K•mol)) = 177.732

XYZ coordinate

|     |               |               |               |
|-----|---------------|---------------|---------------|
| Ru2 | -4.2907436818 | 9.4713041721  | 1.5417341117  |
| C3  | -8.5611235750 | 11.7735706892 | 0.4998457624  |
| C4  | -8.3407664190 | 10.4476222938 | 0.1332248310  |
| C5  | -7.1064943921 | 9.8764581502  | 0.4239630476  |
| N6  | -6.1433224817 | 10.5438220073 | 1.0672874718  |
| C7  | -6.3292869671 | 11.8422168018 | 1.4001573921  |
| C8  | -7.5373020626 | 12.4864600518 | 1.1264499408  |
| H9  | -9.5092569080 | 12.2565566302 | 0.2865515071  |
| H10 | -9.0734690177 | 9.8388605613  | -0.3852489201 |
| H11 | -7.6735799128 | 13.5267016965 | 1.3981582431  |
| C12 | -2.8104443511 | 13.2269126090 | 3.2454462327  |
| C13 | -5.1531151088 | 12.4313071740 | 2.0276555184  |
| N14 | -4.1629786168 | 11.5314811077 | 2.2360808238  |
| C15 | -3.0386998900 | 11.9120917512 | 2.8559527824  |
| H16 | -1.8721381559 | 13.4554417644 | 3.7389408734  |
| C17 | -6.6831440369 | 8.5080968488  | -0.0265904471 |
| O18 | -7.4580075142 | 7.7437428531  | -0.5693924951 |
| C19 | -2.1209389964 | 10.7722029194 | 3.1851706102  |
| O20 | -1.0458526814 | 10.9439409439 | 3.7246757960  |
| O21 | -5.4104168885 | 8.3038266614  | 0.2008075885  |
| O22 | -2.6653962478 | 9.6210072697  | 2.8772050287  |
| N23 | -5.3389959459 | 8.6324574235  | 3.1855680043  |
| C24 | -5.9101968488 | 7.4163233158  | 3.0549136142  |
| C25 | -6.5803721175 | 6.8087862318  | 4.1111478796  |
| H26 | -5.8110419930 | 6.9445899846  | 2.0836693913  |
| H27 | -7.0269504540 | 5.8315132049  | 3.9652699517  |
| N28 | -3.1513656343 | 10.1482790169 | -0.1060402054 |
| C29 | -3.7161473747 | 10.7559173114 | -1.1667807077 |
| C30 | -2.9654615595 | 11.1825306834 | -2.2538131790 |
| H31 | -4.7906422326 | 10.8881110968 | -1.1346838727 |
| H32 | -3.4584144542 | 11.6651237199 | -3.0905859936 |
| C33 | -3.8049015733 | 14.1725015112 | 3.0059091835  |
| H34 | -3.6676543316 | 15.2091205517 | 3.2962968727  |
| C35 | -4.9970053959 | 13.7655489170 | 2.4065681149  |
| H36 | -5.7973340347 | 14.4753062423 | 2.2330826447  |
| C37 | -6.6593335484 | 7.4701372743  | 5.3356559520  |
| H38 | -7.1768842264 | 7.0175482078  | 6.1756167814  |
| C39 | -6.0548489839 | 8.7213976037  | 5.4670930697  |
| H40 | -6.0811909562 | 9.2667109086  | 6.4041585977  |
| C41 | -5.3990963029 | 9.2683573764  | 4.3726145425  |
| H42 | -4.8985910865 | 10.2266970206 | 4.4324901005  |
| C43 | -1.5858822207 | 10.9708410433 | -2.2449121693 |
| H44 | -0.9734457682 | 11.2958092745 | -3.0801208191 |
| C45 | -1.0100758334 | 10.3273088576 | -1.1511749732 |
| H46 | 0.0555397728  | 10.1323088496 | -1.1053615953 |
| C47 | -1.8230412258 | 9.9205574855  | -0.0990209888 |
| H48 | -1.4359271763 | 9.3921213359  | 0.7632286773  |
| O48 | -3.2968842538 | 7.8514477973  | 1.3405185406  |
| H50 | -3.1856212064 | 7.4481742839  | 2.2179296402  |



[Ru<sup>V</sup>(bda)(py)<sub>2</sub>-O]<sup>+</sup>—Doublet

E (B3LYP-D3/LACV3P<sup>\*\*\*</sup>) (a.u.) = -1537.276968

G<sub>solv</sub> (kcal/mol) = -60.585

ZPE (kcal/mol) = 221.825

ΔH<sub>298</sub> (kcal/mol) = 17.149

ΔS<sub>298</sub> (cal/(K•mol)) = 179.079

XYZ coordinate

|     |               |               |               |
|-----|---------------|---------------|---------------|
| O1  | -3.4110759284 | 7.8807772045  | 1.4298052428  |
| Ru2 | -4.2425537348 | 9.3925492948  | 1.5396964692  |
| C3  | -8.5437434640 | 11.8202176664 | 0.4546130605  |
| C4  | -8.3222529755 | 10.5037866950 | 0.0607520247  |
| C5  | -7.0921760379 | 9.9228997196  | 0.3580458794  |
| N6  | -6.1286245623 | 10.5724850679 | 1.0168221071  |
| C7  | -6.3247170881 | 11.8571412387 | 1.3892637925  |
| C8  | -7.5285979359 | 12.5105911035 | 1.1196534100  |
| H9  | -9.4880791801 | 12.3112701976 | 0.2420723044  |
| H10 | -9.0514305535 | 9.9068770383  | -0.4760275319 |
| H11 | -7.6726296136 | 13.5394743736 | 1.4276619354  |
| C12 | -2.8795300186 | 13.2450679622 | 3.3702357451  |
| C13 | -5.1709096999 | 12.4380647967 | 2.0714968040  |
| N14 | -4.1817918172 | 11.5447350029 | 2.2987450010  |
| C15 | -3.0786800510 | 11.9346478563 | 2.9439401428  |
| H16 | -1.9543446488 | 13.4778251407 | 3.8856617868  |
| C17 | -6.7040085937 | 8.5415307924  | -0.0868948758 |
| O18 | -7.4957085028 | 7.8201749128  | -0.6658203152 |
| C19 | -2.1078101065 | 10.8231893332 | 3.2228614350  |
| O20 | -1.0466539637 | 11.0385424545 | 3.7797303853  |
| O21 | -5.4602452109 | 8.2649651714  | 0.1941090615  |
| O22 | -2.5601129730 | 9.6643913233  | 2.8299046550  |
| N23 | -5.3401749752 | 8.6536527001  | 3.2062041126  |
| C24 | -6.0047084913 | 7.4864896040  | 3.0776404390  |
| C25 | -6.7078564712 | 6.9319999078  | 4.1403332469  |
| H26 | -5.9497471162 | 7.0067721453  | 2.1075763094  |
| H27 | -7.2291107454 | 5.9918599439  | 3.9985893419  |
| N28 | -3.1335240625 | 10.1114792851 | -0.1294235050 |
| C29 | -3.7486623814 | 10.5406126773 | -1.2484368269 |
| C30 | -3.0320198041 | 10.9844498147 | -2.3517677854 |
| H31 | -4.8299461876 | 10.5094371880 | -1.2504370872 |
| H32 | -3.5636828471 | 11.3223620669 | -3.2344577669 |
| C33 | -3.8815246167 | 14.1789249437 | 3.1248742514  |
| H34 | -3.7685638570 | 15.2114780228 | 3.4396817113  |
| C35 | -5.0468969824 | 13.7678898716 | 2.4756726133  |
| H36 | -5.8468860076 | 14.4729704255 | 2.2820734428  |
| C37 | -6.7184290988 | 7.5938335276  | 5.3674008259  |
| H38 | -7.2584829885 | 7.1799072992  | 6.2131731258  |
| C39 | -6.0131555113 | 8.7910584153  | 5.4950796185  |
| H40 | -5.9805674995 | 9.3317245802  | 6.4345527506  |
| C41 | -5.3290638844 | 9.2888447034  | 4.3941379809  |
| H42 | -4.7498004858 | 10.2007417579 | 4.4522222226  |
| C43 | -1.6376897893 | 10.9719702296 | -2.3012094212 |
| H44 | -1.0526730950 | 11.3107749390 | -3.1504874176 |
| C45 | -1.0084893563 | 10.5048001838 | -1.1478871864 |
| H46 | 0.0721179193  | 10.4618837914 | -1.0691930785 |
| C47 | -1.7856957900 | 10.0760083610 | -0.0786725115 |
| H48 | -1.3489285921 | 9.6868458255  | 0.8333190695  |

Fe<sup>II</sup>(bda)(py)<sub>2</sub>—Quintet

E (B3LYP-D3/LACV3P<sup>\*\*\*</sup>) (a.u.) = -1491.931214

G<sub>solv</sub> (kcal/mol) = -28.348

ZPE (kcal/mol) = 218.371

ΔH<sub>298</sub> (kcal/mol) = 17.019

ΔS<sub>298</sub> (cal/(K•mol)) = 184.358

XYZ coordinate

|     |               |               |               |
|-----|---------------|---------------|---------------|
| Fe1 | -4.3327285039 | 9.5663688431  | 1.5353825852  |
| C3  | -8.4846362685 | 11.9612799332 | 0.2132137481  |
| C4  | -8.2396403399 | 10.6421455696 | -0.1722072219 |
| C5  | -7.0376231942 | 10.0551908993 | 0.2266696082  |
| N6  | -6.1470363846 | 10.7259488222 | 0.9535712774  |
| C7  | -6.3667647472 | 11.9916760772 | 1.3454505243  |
| C8  | -7.5439070794 | 12.6533739718 | 0.9834917202  |
| H9  | -9.4076317616 | 12.4539513443 | -0.0792816864 |
| H10 | -8.9361116997 | 10.0570042363 | -0.7617783528 |
| H11 | -7.7278597909 | 13.6761122205 | 1.2950022247  |
| C12 | -3.0172155997 | 13.1865682266 | 3.6496788454  |
| C13 | -5.2548441535 | 12.5315168600 | 2.1674097132  |
| N14 | -4.2897557043 | 11.6235422133 | 2.3870607630  |
| C15 | -3.2018763292 | 11.9190650196 | 3.0950935276  |
| H16 | -2.1152928308 | 13.3810394317 | 4.2185171002  |
| C17 | -6.6207873236 | 8.6187011546  | -0.1113870415 |
| O18 | -7.4138989368 | 7.9192147138  | -0.7359523706 |
| C19 | -2.2050435472 | 10.7618766958 | 3.2311735933  |
| O20 | -1.1616292547 | 10.9688719909 | 3.8451767498  |
| O21 | -5.4430167899 | 8.3024785454  | 0.3237520699  |
| O22 | -2.5925351840 | 9.6707616130  | 2.6525620485  |
| N23 | -5.3159624774 | 8.6219064461  | 3.2930721925  |
| C24 | -6.0809168978 | 7.5231038757  | 3.1605940421  |
| C25 | -6.6835174356 | 6.8963115932  | 4.2490132123  |
| H26 | -6.1906629480 | 7.1550488168  | 2.1463853339  |
| H27 | -7.2909450061 | 6.0112610507  | 4.0907882992  |
| N28 | -3.1435111150 | 10.1397136222 | -0.2578155906 |
| C29 | -3.7580769633 | 10.3260696353 | -1.4382541302 |
| C30 | -3.0782090291 | 10.7113832203 | -2.5894524485 |
| H31 | -4.8266647850 | 10.1498633965 | -1.4454507356 |
| H32 | -3.6227520558 | 10.8504161320 | -3.5177291211 |
| C33 | -4.0101468262 | 14.1447017922 | 3.4399705661  |
| H34 | -3.9047838739 | 15.1431013658 | 3.8549937410  |
| C35 | -5.1458851257 | 13.8231898469 | 2.6897770606  |
| H36 | -5.9216017206 | 14.5615291254 | 2.5156718964  |
| C37 | -6.4860951950 | 7.4234867172  | 5.5241254836  |
| H38 | -6.9427928885 | 6.9580477499  | 6.3929434005  |
| C39 | -5.6857377921 | 8.5574634756  | 5.6647301923  |
| H40 | -5.4967382371 | 8.9996578349  | 6.6375051189  |
| C41 | -5.1187840985 | 9.1195785735  | 4.5254199362  |
| H42 | -4.4797928086 | 9.9923688545  | 4.5854252071  |
| C43 | -1.6985326217 | 10.9050857388 | -2.5193490213 |
| H44 | -1.1368117150 | 11.2062756123 | -3.3990190945 |
| C45 | -1.0542925404 | 10.6978461257 | -1.3007146571 |
| H46 | 0.0183217429  | 10.8263275125 | -1.1989415901 |
| C47 | -1.8108362309 | 10.3137049101 | -0.1959503410 |
| H48 | -1.3631252067 | 10.1252177911 | 0.7732201457  |

[Fe<sup>III</sup>(bda)(py)<sub>2</sub>-H<sub>2</sub>O]<sup>+</sup>—Sextet  
E (B3LYP-D3/LACV3P<sup>\*\*\*</sup>) (a.u.) = -1568.190941

G<sub>solv</sub> (kcal/mol) = -56.580

ZPE (kcal/mol) = 235.490

ΔH<sub>298</sub> (kcal/mol) = 18.334

ΔS<sub>298</sub> (cal/(K•mol)) = 190.441

XYZ coordinate

|      |               |               |               |
|------|---------------|---------------|---------------|
| Fe56 | -4.3166605562 | 9.4693902187  | 1.6135022361  |
| C57  | -8.5176041600 | 11.8774488775 | 0.4136445101  |
| C58  | -8.3115374694 | 10.5391088181 | 0.0775516863  |
| C59  | -7.0901821997 | 9.9612094587  | 0.4215009996  |
| N60  | -6.1446452722 | 10.6497138844 | 1.0564295384  |
| C61  | -6.3256957263 | 11.9372088557 | 1.3976797661  |
| C62  | -7.5171279517 | 12.5932088869 | 1.0810899443  |
| H63  | -9.4530495368 | 12.3671145749 | 0.1611023087  |
| H64  | -9.0516790394 | 9.9361599539  | -0.4364184788 |
| H65  | -7.6684852741 | 13.6323335983 | 1.3510571946  |
| C66  | -2.8677471999 | 13.1834676936 | 3.5005209173  |
| C67  | -5.1666777924 | 12.4991467134 | 2.1231404614  |
| N68  | -4.2020899379 | 11.5878166627 | 2.3414375566  |
| C69  | -3.0914410383 | 11.8990837163 | 3.0067568691  |
| H70  | -1.9485439042 | 13.3870980489 | 4.0380789042  |
| C71  | -6.6976334366 | 8.5294544428  | 0.1049426957  |
| O72  | -7.4881248005 | 7.7783006215  | -0.4366378108 |
| C73  | -2.1312436344 | 10.7371055314 | 3.1758652183  |
| O74  | -1.0700768942 | 10.8925511866 | 3.7518509237  |
| O75  | -5.4691504334 | 8.2466175013  | 0.4677129791  |
| O76  | -2.5716372006 | 9.6284730895  | 2.6288994048  |
| N77  | -5.3935964497 | 8.8419487370  | 3.3870817755  |
| C78  | -5.9899564355 | 7.6335197847  | 3.3626699935  |
| C79  | -6.6435881046 | 7.1105903285  | 4.4729220816  |
| H80  | -5.9258306026 | 7.0966447535  | 2.4247036748  |
| H81  | -7.1117711049 | 6.1344893415  | 4.4082471240  |
| N82  | -3.2817904781 | 10.1062401833 | -0.2201088166 |
| C83  | -3.9648652909 | 10.2507740180 | -1.3718434584 |
| C84  | -3.3597050430 | 10.6664499051 | -2.5516202070 |
| H85  | -5.0190169903 | 10.0141562310 | -1.3340956730 |
| H86  | -3.9531516125 | 10.7677649215 | -3.4538195666 |
| C87  | -3.8513082990 | 14.1477209685 | 3.2777865659  |
| H88  | -3.7183586708 | 15.1608680939 | 3.6444388352  |
| C89  | -5.0178205670 | 13.8085868162 | 2.5836368889  |
| H90  | -5.7907949308 | 14.5487291048 | 2.4088776220  |
| C91  | -6.6788437807 | 7.8577191623  | 5.6495412653  |
| H92  | -7.1815916053 | 7.4745052483  | 6.5322742980  |
| C93  | -6.0524746789 | 9.1048407662  | 5.6760524044  |
| H94  | -6.0475976427 | 9.7160376038  | 6.5720690790  |
| C95  | -5.4186738559 | 9.5585608388  | 4.5262921991  |
| H96  | -4.9120872086 | 10.5150947842 | 4.5032811358  |
| C97  | -1.9903526640 | 10.9344018393 | -2.5470556708 |
| H98  | -1.4878591302 | 11.2584272038 | -3.4532802333 |
| C99  | -1.2773561790 | 10.7699044541 | -1.3596626585 |
| H100 | -0.2098747971 | 10.9554055467 | -1.3099415708 |
| C101 | -1.9561767966 | 10.3542560778 | -0.2196504524 |
| H102 | -1.4464794517 | 10.1977439618 | 0.7222446873  |
| O54  | -3.3824229179 | 7.4747639993  | 1.6233688436  |
| H55  | -2.4380243516 | 7.5377786689  | 1.8278025836  |
| H56  | -3.5237550969 | 6.9930237025  | 0.7964073555  |

[Fe<sup>IV</sup>(bda)(py)<sub>2</sub>-OH]<sup>+</sup>—Quintet

E (B3LYP-D3/LACV3P<sup>\*\*\*</sup>) (a.u.) = -1567.483173

G<sub>solv</sub> (kcal/mol) = -54.098

ZPE (kcal/mol) = 227.931

ΔH<sub>298</sub> (kcal/mol) = 17.831

ΔS<sub>298</sub> (cal/(K•mol)) = 186.961

XYZ coordinate

|     |               |               |               |
|-----|---------------|---------------|---------------|
| Fe1 | -4.2331967035 | 9.3065213665  | 1.5114342111  |
| C3  | -8.4421591917 | 11.9554498555 | 0.3547006972  |
| C4  | -8.2715491422 | 10.6158861131 | 0.0029206364  |
| C5  | -7.0657296264 | 10.0085270313 | 0.3457229765  |
| N6  | -6.0990286986 | 10.6494678191 | 0.9919628690  |
| C7  | -6.2494607610 | 11.9339442929 | 1.3469772731  |
| C8  | -7.4223491300 | 12.6287597862 | 1.0335860846  |
| H9  | -9.3617485335 | 12.4755914983 | 0.1055549376  |
| H10 | -9.0254447488 | 10.0399206448 | -0.5224547565 |
| H11 | -7.5434914661 | 13.6680488540 | 1.3174844375  |
| C12 | -2.8231094493 | 13.1005498837 | 3.5334141415  |
| C13 | -5.0887862399 | 12.4596874829 | 2.0906547866  |
| N14 | -4.1579132489 | 11.5230862635 | 2.3319007034  |
| C15 | -3.0694256404 | 11.8239267633 | 3.0322085985  |
| H16 | -1.9168831938 | 13.2819178904 | 4.1004978842  |
| C17 | -6.6922797457 | 8.5913255451  | 0.0127430531  |
| O18 | -7.4575284765 | 7.8213540385  | -0.5355721873 |
| C19 | -2.1564871871 | 10.6501888107 | 3.2332936906  |
| O20 | -1.1169067304 | 10.7308541260 | 3.8573790622  |
| O21 | -5.4572731219 | 8.2812481946  | 0.3535461717  |
| O22 | -2.5868426386 | 9.5416642040  | 2.6603756167  |
| N23 | -5.4515352263 | 8.7441793792  | 3.2594773620  |
| C24 | -5.9320537299 | 7.4856957430  | 3.2343654168  |
| C25 | -6.6753275797 | 6.9629834997  | 4.2876769926  |
| H26 | -5.7025478931 | 6.9116255566  | 2.3441080375  |
| H27 | -7.0459915567 | 5.9455585883  | 4.2285053120  |
| N28 | -3.2121328597 | 10.2118978107 | -0.2304361483 |
| C29 | -3.8790182664 | 10.4749766676 | -1.3677191479 |
| C30 | -3.2488233056 | 10.9817538023 | -2.4984552640 |
| H31 | -4.9390981112 | 10.2598058661 | -1.3618567185 |
| H32 | -3.8271538661 | 11.1785058814 | -3.3946523617 |
| C33 | -3.7730884862 | 14.0892622468 | 3.2774838555  |
| H34 | -3.6272903075 | 15.1009131871 | 3.6429234053  |
| C35 | -4.9229597220 | 13.7691417828 | 2.5512575084  |
| H36 | -5.6736617020 | 14.5250267200 | 2.3508439148  |
| C37 | -6.9226964392 | 7.7637149356  | 5.4022557704  |
| H38 | -7.4979972666 | 7.3812332785  | 6.2397773842  |
| C39 | -6.4152731500 | 9.0639151485  | 5.4272319197  |
| H40 | -6.5787340936 | 9.7183900890  | 6.2766398831  |
| C41 | -5.6827961831 | 9.5153812535  | 4.3361185539  |
| H42 | -5.2649037259 | 10.5141465558 | 4.3098339214  |
| C43 | -1.8742628389 | 11.2159090258 | -2.4533876386 |
| H44 | -1.3527622954 | 11.6100679595 | -3.3201499503 |
| C45 | -1.1794774311 | 10.9233066010 | -1.2798367909 |
| H46 | -0.1081907197 | 11.0743238923 | -1.2032661317 |
| C47 | -1.8824986517 | 10.4187606067 | -0.1915991659 |
| H48 | -1.3856350069 | 10.1553192504 | 0.7336790564  |
| O48 | -3.4165452121 | 7.6990266997  | 1.4134451100  |
| H49 | -2.6131660089 | 7.7656753533  | 1.9676765151  |

[Fe<sup>V</sup>(bda)(py)<sub>2</sub>-O]<sup>+</sup>—Quartet  
E (B3LYP-D3/LACV3P<sup>\*\*\*</sup>) (a.u.) = -1566.800687

G<sub>solv</sub> (kcal/mol) = -53.084

ZPE (kcal/mol) = 221.663

ΔH<sub>298</sub> (kcal/mol) = 17.114

ΔS<sub>298</sub> (cal/(K•mol)) = 179.440

XYZ coordinate

|     |               |               |               |
|-----|---------------|---------------|---------------|
| O1  | -3.3687727398 | 7.7911936121  | 1.4314906080  |
| Fe2 | -4.1546540481 | 9.2115119715  | 1.5407540356  |
| C3  | -8.6729786749 | 11.8865636338 | 0.5262452172  |
| C4  | -8.4291477928 | 10.5628339039 | 0.1555014112  |
| C5  | -7.1665810767 | 10.0422838570 | 0.4440125360  |
| N6  | -6.2247896311 | 10.7447310065 | 1.0549427410  |
| C7  | -6.4423518772 | 12.0137620866 | 1.4158551998  |
| C8  | -7.6716660831 | 12.6309377196 | 1.1598977327  |
| H9  | -9.6368798992 | 12.3421026163 | 0.3221666474  |
| H10 | -9.1670598961 | 9.9447448951  | -0.3432319835 |
| H11 | -7.8514161110 | 13.6602751220 | 1.4493899025  |
| C12 | -2.8982711391 | 13.3667110014 | 3.3041338385  |
| C13 | -5.2592720191 | 12.6116479834 | 2.0815280817  |
| N14 | -4.2989979328 | 11.7077667603 | 2.3069166408  |
| C15 | -3.1668486192 | 12.0583239235 | 2.8987024828  |
| H16 | -1.9535404413 | 13.6001227652 | 3.7820020594  |
| C17 | -6.7071364290 | 8.6636777231  | 0.0768990528  |
| O18 | -7.4373172934 | 7.8458970155  | -0.4462235396 |
| C19 | -2.2415087550 | 10.8978885946 | 3.1045818222  |
| O20 | -1.1377487673 | 11.0179164590 | 3.5977476561  |
| O21 | -5.4286756490 | 8.4012585322  | 0.3440659190  |
| O22 | -2.7209897191 | 9.7150150908  | 2.7242818089  |
| N23 | -5.2415052544 | 8.5466659375  | 3.0918929606  |
| C24 | -5.7824346929 | 7.3145470625  | 3.0132792430  |
| C25 | -6.4969497721 | 6.7768767907  | 4.0759888419  |
| H26 | -5.6295021776 | 6.7852619209  | 2.0805392200  |
| H27 | -6.9195445275 | 5.7828558253  | 3.9820363689  |
| N28 | -3.1093442500 | 9.9560505915  | -0.0042371952 |
| C29 | -3.7302820366 | 10.5528303216 | -1.0376683145 |
| C30 | -3.0152893808 | 11.0267703580 | -2.1296184655 |
| H31 | -4.8051045863 | 10.6342624358 | -0.9677810169 |
| H32 | -3.5445621738 | 11.5032496356 | -2.9472457383 |
| C33 | -3.8890582986 | 14.3223237607 | 3.0726939598  |
| H34 | -3.7333801308 | 15.3548157764 | 3.3693496816  |
| C35 | -5.0889978142 | 13.9476373703 | 2.4586920958  |
| H36 | -5.8664199898 | 14.6815953097 | 2.2756854768  |
| C37 | -6.6468287136 | 7.5284830882  | 5.2414209514  |
| H38 | -7.1965452690 | 7.1277872961  | 6.0873710846  |
| C39 | -6.0744002342 | 8.7993968716  | 5.3087550130  |
| H40 | -6.1601657721 | 9.4135558079  | 6.1982381095  |
| C41 | -5.3695666196 | 9.2794896360  | 4.2128686060  |
| H42 | -4.8921919340 | 10.2486787815 | 4.2083391641  |
| C43 | -1.6292128825 | 10.8670059674 | -2.1523211204 |
| H44 | -1.0483567862 | 11.2236317899 | -2.9971934826 |
| C45 | -1.0009047557 | 10.2354143709 | -1.0788854774 |
| H46 | 0.0724482499  | 10.0834229909 | -1.0572760526 |
| C47 | -1.7722450837 | 9.7847305582  | -0.0153305268 |
| H48 | -1.3479479095 | 9.2861679933  | 0.8478432382  |

6-coordinate [Fe<sup>V</sup>(bda)(py)<sub>2</sub>-O]<sup>+</sup>—Quartet

E (B3LYP-D3/LACV3P<sup>\*\*\*</sup>) (a.u.) = -1566.806852

G<sub>solv</sub> (kcal/mol) = -57.438

ZPE (kcal/mol) = 220.748

ΔH<sub>298</sub> (kcal/mol) = 17.284

ΔS<sub>298</sub> (cal/(K•mol)) = 180.929

XYZ coordinate

|     |               |               |               |
|-----|---------------|---------------|---------------|
| O1  | -1.9466060806 | 7.3587446367  | 1.8242756839  |
| Fe2 | -3.1887897630 | 7.9386142871  | 0.9438025935  |
| C3  | -6.6732358818 | 9.7962351938  | -1.6022456090 |
| C4  | -6.5098259681 | 8.4110477785  | -1.5046199355 |
| C5  | -5.4476381138 | 7.9376053393  | -0.7377388674 |
| N6  | -4.6370244533 | 8.7853442918  | -0.1102551801 |
| C7  | -4.7644598151 | 10.1167990533 | -0.1797317999 |
| C8  | -5.7964865418 | 10.6688201419 | -0.9425657567 |
| H9  | -7.4854518201 | 10.2056068433 | -2.1948548583 |
| H10 | -7.1634834395 | 7.7031431690  | -2.0020305711 |
| H11 | -5.9293804134 | 11.7418965298 | -1.0195160014 |
| C12 | -1.8321590967 | 11.9022555189 | 2.2879395605  |
| C13 | -3.7499015381 | 10.8134503531 | 0.6411387503  |
| N14 | -3.0015020616 | 9.9889184795  | 1.4231447166  |
| C15 | -2.0941095650 | 10.5307040425 | 2.2503005669  |
| H16 | -1.0717841800 | 12.2828893981 | 2.9609239234  |
| C17 | -5.0249191718 | 6.4875549527  | -0.5449627671 |
| O18 | -5.6866606436 | 5.5829230060  | -1.0127562806 |
| C19 | -1.3704221372 | 9.6529075681  | 3.2302640055  |
| O20 | -0.1178912556 | 9.6239371424  | 3.2986778036  |
| O21 | -3.8883650793 | 6.3708539632  | 0.1139393931  |
| O22 | -1.9674941918 | 9.0091033453  | 4.1299727991  |
| N23 | -4.4592802884 | 7.5802626055  | 2.4512802871  |
| C24 | -4.4162064535 | 6.3394864887  | 2.9743891428  |
| C25 | -5.2394335119 | 5.9641644724  | 4.0295673607  |
| H26 | -3.7082136058 | 5.6591263283  | 2.5189518409  |
| H27 | -5.1748061536 | 4.9556214352  | 4.4221211413  |
| N28 | -1.8924278664 | 8.2301644640  | -0.6076273072 |
| C29 | -2.2048047093 | 7.9285859129  | -1.8804611242 |
| C30 | -1.2976791967 | 8.0767975827  | -2.9235364834 |
| H31 | -3.1985678364 | 7.5439959308  | -2.0588725051 |
| H32 | -1.5964191499 | 7.8146620707  | -3.9325158969 |
| C33 | -2.5784179287 | 12.7467930742 | 1.4682032819  |
| H34 | -2.4051942147 | 13.8180214621 | 1.4762135945  |
| C35 | -3.5623216408 | 12.1974885843 | 0.6500003445  |
| H36 | -4.1697523174 | 12.8320949532 | 0.0147811191  |
| C37 | -6.1315802514 | 6.8949725196  | 4.5592024437  |
| H38 | -6.7861083970 | 6.6264767612  | 5.3824875644  |
| C39 | -6.1702872399 | 8.1784782768  | 4.0131625858  |
| H40 | -6.8481291490 | 8.9353201336  | 4.3924444965  |
| C41 | -5.3172538412 | 8.4822060285  | 2.9605054888  |
| H42 | -5.3127408203 | 9.4647990835  | 2.5062325681  |
| C43 | -0.0160309060 | 8.5469845075  | -2.6422859256 |
| H44 | 0.7151308328  | 8.6693071535  | -3.4352275949 |
| C45 | 0.3131702218  | 8.8420925180  | -1.3194518669 |
| H46 | 1.3027692763  | 9.1911160942  | -1.0456068354 |
| C47 | -0.6460960376 | 8.6645717470  | -0.3308311217 |
| H48 | -0.4200427682 | 8.8391758043  | 0.7132757017  |

Ru<sup>III</sup>(bda)(py)<sub>2</sub>-OH—Doublet  
E (B3LYP-D3/LACV3P<sup>\*\*\*</sup>) (a.u.) = -1538.163901

G<sub>solv</sub> (kcal/mol) = -32.677

ZPE (kcal/mol) = 227.472

ΔH<sub>298</sub> (kcal/mol) = 17.825

ΔS<sub>298</sub> (cal/(K•mol)) = 184.716

XYZ coordinate

|     |               |               |               |
|-----|---------------|---------------|---------------|
| O1  | -3.1767342610 | 7.7340165477  | 1.3030330392  |
| Ru2 | -4.2237633957 | 9.3429023696  | 1.4881899540  |
| C3  | -8.6101412445 | 11.9925436602 | 0.3431247228  |
| C4  | -8.3760827909 | 10.6752824559 | -0.0438388699 |
| C5  | -7.1528145234 | 10.0954501572 | 0.3000914499  |
| N6  | -6.2223679379 | 10.7507778293 | 0.9925862417  |
| C7  | -6.4327219130 | 12.0257240549 | 1.3626789846  |
| C8  | -7.6255267300 | 12.6860341251 | 1.0513515201  |
| H9  | -9.5466326558 | 12.4831526548 | 0.0936352015  |
| H10 | -9.0889501246 | 10.0806323245 | -0.6034529807 |
| H11 | -7.7854503118 | 13.7147276612 | 1.3553419065  |
| C12 | -3.0333802803 | 13.3898498273 | 3.4724351645  |
| C13 | -5.2919446583 | 12.6116894957 | 2.1010237981  |
| N14 | -4.3118774921 | 11.7264049360 | 2.3312253524  |
| C15 | -3.2226187279 | 12.0877299807 | 3.0035299625  |
| H16 | -2.1214967140 | 13.6199025746 | 4.0112696562  |
| C17 | -6.7634122238 | 8.6937923242  | -0.1256676855 |
| O18 | -7.5887988633 | 7.9945040571  | -0.7076626227 |
| C19 | -2.2415123204 | 10.9629126024 | 3.2641042786  |
| O20 | -1.1966461215 | 11.2055589222 | 3.8618765734  |
| O21 | -5.5382235000 | 8.3765865298  | 0.1555272472  |
| O22 | -2.6429178758 | 9.8048092820  | 2.8421908959  |
| N23 | -5.2832037017 | 8.5070922036  | 3.1009577495  |
| C24 | -5.9257153916 | 7.3329853023  | 2.9294811865  |
| C25 | -6.6372782292 | 6.7297799930  | 3.9620231028  |
| H26 | -5.8596605266 | 6.9055685345  | 1.9350321597  |
| H27 | -7.1445994795 | 5.7885023598  | 3.7795791839  |
| N28 | -3.1024576058 | 10.0824997017 | -0.1243365312 |
| C29 | -3.6776973107 | 10.6013012122 | -1.2244794382 |
| C30 | -2.9289163006 | 11.0977835532 | -2.2845025659 |
| H31 | -4.7602530357 | 10.6034857724 | -1.2369312684 |
| H32 | -3.4341550960 | 11.5095403164 | -3.1518676850 |
| C33 | -4.0376724023 | 14.3243369788 | 3.2296659983  |
| H34 | -3.9347073649 | 15.3486164957 | 3.5765326096  |
| C35 | -5.1895316020 | 13.9351849013 | 2.5411153779  |
| H36 | -5.9844033056 | 14.6481325451 | 2.3514650924  |
| C37 | -6.6841419574 | 7.3509310415  | 5.2088193285  |
| H38 | -7.2351031887 | 6.9029070537  | 6.0304867823  |
| C39 | -6.0065303118 | 8.5583505514  | 5.3833051294  |
| H40 | -6.0071755985 | 9.0746514689  | 6.3375211299  |
| C41 | -5.3136499041 | 9.1026623395  | 4.3093438424  |
| H42 | -4.7592461306 | 10.0285404424 | 4.3923013470  |
| C43 | -1.5365489035 | 11.0499229986 | -2.2077388658 |
| H44 | -0.9249804216 | 11.4351121138 | -3.0184284176 |
| C45 | -0.9462487357 | 10.4923341201 | -1.0750728784 |
| H46 | 0.1317272191  | 10.4259739958 | -0.9736862190 |
| C47 | -1.7589489136 | 10.0114902617 | -0.0534002247 |
| H48 | -1.3635443386 | 9.5585791147  | 0.8474624210  |
| H49 | -3.0638062669 | 7.3660756271  | 2.1930870948  |

Fe<sup>III</sup>(bda)(py)<sub>2</sub>-OH—Sextet

E (B3LYP-D3/LACV3P<sup>\*\*\*</sup>) (a.u.) = -1567.761426

G<sub>solv</sub> (kcal/mol) = -32.400

ZPE (kcal/mol) = 226.693

ΔH<sub>298</sub> (kcal/mol) = 18.303

ΔS<sub>298</sub> (cal/(K•mol)) = 194.500

XYZ coordinate

|      |               |               |               |
|------|---------------|---------------|---------------|
| Fe56 | -4.1933507516 | 9.2898737241  | 1.5788505144  |
| C57  | -8.3629010026 | 12.1767002813 | 0.4378165172  |
| C58  | -8.2454412220 | 10.8372122920 | 0.0773688289  |
| C59  | -7.0780433582 | 10.1577415939 | 0.4366188308  |
| N60  | -6.0930369018 | 10.7464799397 | 1.1081109000  |
| C61  | -6.1987199132 | 12.0344574446 | 1.4725688501  |
| C62  | -7.3282272426 | 12.7923240643 | 1.1483247855  |
| H63  | -9.2517067408 | 12.7432556330 | 0.1748419119  |
| H64  | -9.0109727030 | 10.2954995235 | -0.4660687178 |
| H65  | -7.4051638806 | 13.8333389318 | 1.4422192194  |
| C66  | -2.7714093346 | 13.1166065026 | 3.7087436755  |
| C67  | -5.0320561084 | 12.5204085291 | 2.2460134121  |
| N68  | -4.0856374943 | 11.5841758951 | 2.4287692116  |
| C69  | -2.9906723946 | 11.8621999561 | 3.1357246708  |
| H70  | -1.8604122860 | 13.2742717530 | 4.2742739302  |
| C71  | -6.8358325128 | 8.6940853444  | 0.0947450088  |
| O72  | -7.7212134142 | 8.0778343084  | -0.4951745935 |
| C73  | -1.9994242785 | 10.7095441702 | 3.2525494660  |
| O74  | -0.9757193938 | 10.8851856207 | 3.9084490711  |
| O75  | -5.6816362297 | 8.2563633247  | 0.4707720199  |
| O76  | -2.3695143156 | 9.6543531577  | 2.6106069102  |
| N77  | -5.3534591323 | 8.7794482773  | 3.3687575478  |
| C78  | -5.8466159820 | 7.5274560889  | 3.3526106994  |
| C79  | -6.5934120050 | 7.0163904254  | 4.4102682640  |
| H80  | -5.6260230097 | 6.9560684685  | 2.4583055240  |
| H81  | -6.9764368539 | 6.0030595213  | 4.3544649141  |
| N82  | -3.3721346702 | 10.0587566897 | -0.2909868391 |
| C83  | -3.6738322285 | 9.3843588386  | -1.4147342055 |
| C84  | -3.1409816498 | 9.7355022743  | -2.6517039011 |
| H85  | -4.3557342516 | 8.5514210665  | -1.2826465740 |
| H86  | -3.4138717699 | 9.1656909738  | -3.5335621529 |
| C87  | -3.7392811140 | 14.1003132800 | 3.5193571345  |
| H88  | -3.6096013035 | 15.0919873099 | 3.9434594652  |
| C89  | -4.8869406038 | 13.8052405026 | 2.7792136833  |
| H90  | -5.6509413409 | 14.5592186420 | 2.6267289467  |
| C91  | -6.8304665920 | 7.8224126245  | 5.5226008366  |
| H92  | -7.4087547716 | 7.4492943934  | 6.3630461800  |
| C93  | -6.3095393418 | 9.1161991313  | 5.5395211815  |
| H94  | -6.4633372033 | 9.7779630580  | 6.3854724664  |
| C95  | -5.5760246217 | 9.5529869669  | 4.4413293863  |
| H96  | -5.1491279969 | 10.5480717118 | 4.4060203910  |
| C97  | -2.2603939016 | 10.8137161297 | -2.7263602012 |
| H98  | -1.8290658024 | 11.1111456619 | -3.6779054913 |
| C99  | -1.9352548170 | 11.4987205654 | -1.5556918869 |
| H100 | -1.2442772914 | 12.3351572675 | -1.5616249008 |
| C101 | -2.5100063315 | 11.0843423179 | -0.3587995304 |
| H102 | -2.2778717342 | 11.5718127361 | 0.5791938682  |
| O54  | -3.4011413833 | 7.6107817144  | 1.4687505816  |
| H55  | -2.5501335501 | 7.6836066468  | 1.9307183573  |



[Ru<sup>IV</sup>(bda)(py)<sub>2</sub>-H<sub>2</sub>O]<sup>2+</sup>—Singlet

E (B3LYP-D3/LACV3P<sup>\*\*\*</sup>) (a.u.) = -1538.226926

G<sub>solv</sub> (kcal/mol) = -152.984

ZPE (kcal/mol) = 236.794

ΔH<sub>298</sub> (kcal/mol) = 17.550

ΔS<sub>298</sub> (cal/(K•mol)) = 178.219

XYZ coordinate

|     |               |               |               |
|-----|---------------|---------------|---------------|
| O1  | -3.1664635667 | 7.7317093245  | 1.2714878299  |
| Ru2 | -4.3381403193 | 9.5579062038  | 1.5207662218  |
| C3  | -8.5377528274 | 11.7252533805 | 0.3443387144  |
| C4  | -8.2622008564 | 10.4145815520 | -0.0520369016 |
| C5  | -7.0307708420 | 9.8689021486  | 0.2864765830  |
| N6  | -6.1230706028 | 10.5545173477 | 0.9958089818  |
| C7  | -6.3582807698 | 11.8347261476 | 1.3668490566  |
| C8  | -7.5713070473 | 12.4481947498 | 1.0475439061  |
| H9  | -9.4882043383 | 12.1868742260 | 0.0959485680  |
| H10 | -8.9567118891 | 9.8090359542  | -0.6260386549 |
| H11 | -7.7560793391 | 13.4740665476 | 1.3455963825  |
| C12 | -2.9215944130 | 13.1619602725 | 3.4161243877  |
| C13 | -5.2277147976 | 12.4182544454 | 2.0781148097  |
| N14 | -4.2384439140 | 11.5209738233 | 2.2912745621  |
| C15 | -3.1285313428 | 11.8677543768 | 2.9569924552  |
| H16 | -2.0017107040 | 13.3824792757 | 3.9485168516  |
| C17 | -6.5428137208 | 8.5230366674  | -0.1493425444 |
| O18 | -7.2063341581 | 7.7066849949  | -0.7331365667 |
| C19 | -2.2172340685 | 10.7086614024 | 3.2144020232  |
| O20 | -1.1448484539 | 10.7810625595 | 3.7537771074  |
| O21 | -5.2513990076 | 8.3685752867  | 0.1637973831  |
| O22 | -2.7960246604 | 9.5680013656  | 2.8211219783  |
| N23 | -5.4410692765 | 8.6886396781  | 3.1427665462  |
| C24 | -6.1200707387 | 7.5301053675  | 2.9809259161  |
| C25 | -6.8066308480 | 6.9257300377  | 4.0267771641  |
| H26 | -6.1051423273 | 7.0846950415  | 1.9940134818  |
| H27 | -7.3358803917 | 5.9958805779  | 3.8485296647  |
| N28 | -3.1734519278 | 10.3067318227 | -0.0907117861 |
| C29 | -3.7451846015 | 10.8900544217 | -1.1660470080 |
| C30 | -2.9958570581 | 11.3448300055 | -2.2420017903 |
| H31 | -4.8236632092 | 10.9820366129 | -1.1601730871 |
| H32 | -3.4969450365 | 11.8047111807 | -3.0868451066 |
| C33 | -3.9191137021 | 14.1120970895 | 3.1871126400  |
| H34 | -3.7967471147 | 15.1342397146 | 3.5311259292  |
| C35 | -5.0890808366 | 13.7331701466 | 2.5253752546  |
| H36 | -5.8836836839 | 14.4507618710 | 2.3554783361  |
| C37 | -6.7950875770 | 7.5282232531  | 5.2849927019  |
| H38 | -7.3222078349 | 7.0766788417  | 6.1195145043  |
| C39 | -6.0874541951 | 8.7193224589  | 5.4517473631  |
| H40 | -6.0423361812 | 9.2200382048  | 6.4127663933  |
| C41 | -5.4211443043 | 9.2663570965  | 4.3634170735  |
| H42 | -4.8483310032 | 10.1787240939 | 4.4636605825  |
| C43 | -1.6085857623 | 11.1913570645 | -2.2142575146 |
| H44 | -0.9983942828 | 11.5370600652 | -3.0426998928 |
| C45 | -1.0223107755 | 10.5785379088 | -1.1072466879 |
| H46 | 0.0499964874  | 10.4290171923 | -1.0443261167 |
| C47 | -1.8321655346 | 10.1428849691 | -0.0654556060 |
| H48 | -1.4177394698 | 9.6428232720  | 0.8003164615  |
| H49 | -2.8207840038 | 7.3844274193  | 2.1107862115  |
| H50 | -3.6749013595 | 7.0523616305  | 0.7951340835  |

[Fe<sup>IV</sup>(bda)(py)<sub>2</sub>-H<sub>2</sub>O]<sup>2+</sup>—Quintet

E (B3LYP-D3/LACV3P<sup>\*\*\*</sup>) (a.u.) = -1567.777399

G<sub>solv</sub> (kcal/mol) = -147.059

ZPE (kcal/mol) = 233.942

ΔH<sub>298</sub> (kcal/mol) = 18.654

ΔS<sub>298</sub> (cal/(K•mol)) = 191.437

XYZ coordinate

|      |               |               |               |
|------|---------------|---------------|---------------|
| Fe56 | -4.2170454906 | 9.5345851513  | 1.6769913281  |
| C57  | -8.5564414791 | 11.9354763191 | 0.5174673701  |
| C58  | -8.3889316133 | 10.5839057073 | 0.1890550343  |
| C59  | -7.1652301887 | 10.0038023003 | 0.5006271460  |
| N60  | -6.1654959433 | 10.6655832149 | 1.0931228524  |
| C61  | -6.3167717229 | 11.9579586322 | 1.4194474735  |
| C62  | -7.5173818852 | 12.6304151314 | 1.1346066903  |
| H63  | -9.4912330630 | 12.4395895193 | 0.2935175069  |
| H64  | -9.1714543627 | 10.0069314790 | -0.2938248480 |
| H65  | -7.6406175283 | 13.6751135654 | 1.3971339609  |
| C66  | -2.8414214351 | 13.2502806716 | 3.4747347240  |
| C67  | -5.1415685591 | 12.5310272798 | 2.1100986941  |
| N68  | -4.1764601776 | 11.6223160150 | 2.3518257989  |
| C69  | -3.0682008407 | 11.9545155265 | 3.0137880723  |
| H70  | -1.9239742738 | 13.4702259126 | 4.0101970117  |
| C71  | -6.7681022188 | 8.6048724907  | 0.1980896489  |
| O72  | -7.5377891621 | 7.7397115164  | -0.3147309231 |
| C73  | -2.1121576712 | 10.8028030408 | 3.2069831208  |
| O74  | -1.0492957892 | 10.9238624480 | 3.7659799362  |
| O75  | -5.5943068819 | 8.2092637735  | 0.4363319254  |
| O76  | -2.5760594231 | 9.6713333870  | 2.6725865028  |
| N77  | -5.3760634125 | 8.7792795056  | 3.3013966013  |
| C78  | -5.6468155131 | 7.4594489326  | 3.3927616122  |
| C79  | -6.3132330604 | 6.9189063851  | 4.4859552936  |
| H80  | -5.3058045302 | 6.8459068252  | 2.5699311562  |
| H81  | -6.5082655484 | 5.8525979422  | 4.5201079547  |
| N82  | -3.3126925851 | 10.0736155339 | -0.1915487351 |
| C83  | -4.0055455045 | 10.4084730253 | -1.3006123998 |
| C84  | -3.3823442368 | 10.7733467357 | -2.4862613751 |
| H85  | -5.0837814998 | 10.3809832190 | -1.2232173286 |
| H86  | -3.9816882416 | 11.0337677023 | -3.3519324925 |
| C87  | -3.8218025664 | 14.2104042244 | 3.2219169346  |
| H88  | -3.6876315615 | 15.2334716285 | 3.5592421176  |
| C89  | -4.9887873313 | 13.8513489904 | 2.5354698281  |
| H90  | -5.7574041996 | 14.5913876108 | 2.3422442675  |
| C91  | -6.7122478057 | 7.7644077367  | 5.5214489803  |
| H92  | -7.2308717238 | 7.3681202419  | 6.3889875019  |
| C93  | -6.4293564534 | 9.1291373997  | 5.4267042923  |
| H94  | -6.7147596382 | 9.8208631690  | 6.2119318852  |
| C95  | -5.7605590142 | 9.5977344223  | 4.3046466808  |
| H96  | -5.5120676133 | 10.6456977145 | 4.1949913705  |
| C97  | -1.9868446352 | 10.7903128816 | -2.5369599884 |
| H98  | -1.4711252978 | 11.0708272435 | -3.4501619781 |
| C99  | -1.2670204950 | 10.4377312488 | -1.3942755035 |
| H100 | -0.1823281844 | 10.4357993243 | -1.3866090560 |
| C101 | -1.9603264218 | 10.0849618435 | -0.2434792854 |
| H102 | -1.4443283392 | 9.8069524926  | 0.6669799767  |
| O54  | -3.3053195635 | 7.5618101813  | 1.4620970468  |
| H55  | -2.4166074127 | 7.5173417594  | 1.8479758937  |
| H56  | -3.3236546473 | 7.0694549727  | 0.6296727079  |

Pre-reactive structure of  $[\text{Ru}^{\text{V}}(\text{bda})(\text{py})_2\text{-O}]^+$  dimer (O-O distance 2.4 Å)

E (B3LYP-D3/LACV3P\*\*\*) (a.u.) = -3074.547919

$G_{\text{solv}}$  (kcal/mol) = -131.525

ZPE (kcal/mol) = 444.914

$\Delta H_{298}$  (kcal/mol) = 34.666

$\Delta S_{298}$  (cal/(K•mol)) = 305.398

XYZ coordinate

|     |               |               |               |
|-----|---------------|---------------|---------------|
| O1  | -3.8983998204 | 11.8564765890 | 1.7619875401  |
| Ru2 | -4.9100786421 | 13.1287578386 | 2.3427310514  |
| C3  | -8.6332494290 | 16.2290176672 | 1.0023714108  |
| C4  | -8.0110112141 | 15.3940976279 | 0.0785815499  |
| C5  | -6.9539817134 | 14.6002177663 | 0.5122593402  |
| N6  | -6.5193875729 | 14.6008301054 | 1.7798452152  |
| C7  | -7.1028702498 | 15.4242848058 | 2.6820670894  |
| C8  | -8.1678234552 | 16.2491916142 | 2.3176488001  |
| H9  | -9.4647317672 | 16.8619153161 | 0.7086104732  |
| H10 | -8.3028452825 | 15.3305427284 | -0.9641350025 |
| H11 | -8.6311631131 | 16.8969163788 | 3.0521795876  |
| C12 | -5.1700679985 | 14.9979467508 | 6.4023774283  |
| C13 | -6.4973471544 | 15.3530215918 | 4.0117595242  |
| N14 | -5.5394887831 | 14.4066766505 | 4.1101310108  |
| C15 | -4.9052080915 | 14.2283455747 | 5.2746101576  |
| H16 | -4.6127755765 | 14.7894639712 | 7.3092166424  |
| C17 | -6.1865452718 | 13.6860639510 | -0.3956232619 |
| O18 | -6.4950856482 | 13.5308188604 | -1.5654534737 |
| C19 | -3.9528130687 | 13.0703510079 | 5.2699835289  |
| O20 | -3.3153765331 | 12.7503896752 | 6.2646448856  |
| O21 | -5.1984714351 | 13.1015842057 | 0.2193049629  |
| O22 | -3.9530159031 | 12.4429220175 | 4.1344510227  |
| N23 | -6.4929371131 | 11.7066614579 | 2.6637998739  |
| C24 | -7.0847887179 | 11.1028573732 | 1.6129156644  |
| C25 | -7.9809816844 | 10.0544364491 | 1.7788324867  |
| H26 | -6.7961983076 | 11.4527444323 | 0.6312190875  |
| H27 | -8.4337872806 | 9.5943309546  | 0.9069738008  |
| N28 | -3.2953724601 | 14.4777989695 | 2.1121661397  |
| C29 | -3.4425364294 | 15.7210996213 | 1.6116543775  |
| C30 | -2.3664748285 | 16.5903658746 | 1.4983747420  |
| H31 | -4.4393456613 | 16.0079794572 | 1.3000136229  |
| H32 | -2.5223982175 | 17.5858193700 | 1.0964283996  |
| C33 | -6.1489614283 | 15.9845226907 | 6.3117612888  |
| H34 | -6.3917184936 | 16.6062721564 | 7.1679009528  |
| C35 | -6.8265530448 | 16.1583711465 | 5.1045907015  |
| H36 | -7.5983478749 | 16.9135001302 | 5.0149806834  |
| C37 | -8.2663916780 | 9.6017671555  | 3.0669218207  |
| H38 | -8.9451258661 | 8.7688953025  | 3.2222762756  |
| C39 | -7.6542475253 | 10.2326690341 | 4.1490633058  |
| H40 | -7.8390068693 | 9.9113883909  | 5.1680824532  |
| C41 | -6.7718052458 | 11.2775144909 | 3.9105086081  |
| H42 | -6.2470834997 | 11.7655140489 | 4.7187825999  |
| C43 | -1.1006140448 | 16.1571457652 | 1.9010851686  |
| H44 | -0.2440622706 | 16.8196207731 | 1.8212470318  |
| C45 | -0.9553851599 | 14.8632338803 | 2.3988873693  |
| H46 | 0.0010087847  | 14.4613178726 | 2.7144683835  |
| C47 | -2.0743071915 | 14.0453723676 | 2.4957729779  |
| H48 | -2.0048050200 | 13.0358526422 | 2.8802921751  |
| O49 | -4.1721177174 | 9.9663322322  | 3.2154083824  |

|      |               |               |               |
|------|---------------|---------------|---------------|
| Ru50 | -2.9524900075 | 8.8156872750  | 2.7984768660  |
| C51  | 2.0054357411  | 7.9662834758  | 2.3932730728  |
| C52  | 1.5069036285  | 9.2275903274  | 2.7126735825  |
| C53  | 0.1274650855  | 9.3990153240  | 2.7612164852  |
| N54  | -0.7324925272 | 8.4021452877  | 2.5240710889  |
| C55  | -0.2623406421 | 7.1817635725  | 2.1887576304  |
| C56  | 1.1105230464  | 6.9315305860  | 2.1168798958  |
| H57  | 3.0754187586  | 7.7891148370  | 2.3467916334  |
| H58  | 2.1383136900  | 10.0859567280 | 2.9145370931  |
| H59  | 1.4743414716  | 5.9457764539  | 1.8517811955  |
| C60  | -3.5139112403 | 4.5930363883  | 1.5086500701  |
| C61  | -1.3245099542 | 6.2146153563  | 1.9183884302  |
| N62  | -2.5649838136 | 6.6885145233  | 2.1831170187  |
| C63  | -3.6244970625 | 5.8906155683  | 1.9983929680  |
| H64  | -4.4241584393 | 4.0167654891  | 1.3832584643  |
| C65  | -0.5368368501 | 10.7237119755 | 2.9949195836  |
| O66  | 0.1101961933  | 11.7494372341 | 3.1683838650  |
| C67  | -4.9314449655 | 6.5051945717  | 2.4018165669  |
| O68  | -5.9916208086 | 5.9229041447  | 2.2483641618  |
| O69  | -1.8299594708 | 10.6420333586 | 2.9289497601  |
| O70  | -4.7729836819 | 7.6904370716  | 2.9228367289  |
| N71  | -2.5924905559 | 8.5342548265  | 4.8682262392  |
| C72  | -2.5629306304 | 9.6448300497  | 5.6371069762  |
| C73  | -2.3331875476 | 9.5702943309  | 7.0050026718  |
| H74  | -2.7299413230 | 10.5940254264 | 5.1439989203  |
| H75  | -2.3288708370 | 10.4924029905 | 7.5756156820  |
| N76  | -3.3156855130 | 9.2652322938  | 0.7342193609  |
| C77  | -2.3768302756 | 9.8881862831  | -0.0046470411 |
| C78  | -2.6758579364 | 10.4831388164 | -1.2228162373 |
| H79  | -1.3794931487 | 9.9298620827  | 0.4114936063  |
| H80  | -1.8931176351 | 10.9887789195 | -1.7774444356 |
| C81  | -2.2454138772 | 4.1020532316  | 1.2135210115  |
| H82  | -2.1134387786 | 3.0969400644  | 0.8256157027  |
| C83  | -1.1365180188 | 4.9208731627  | 1.4309508989  |
| H84  | -0.1369918374 | 4.5614650752  | 1.2149848634  |
| C85  | -2.1233265204 | 8.3230713277  | 7.5914889041  |
| H86  | -1.9361639661 | 8.2365787788  | 8.6576248148  |
| C87  | -2.1648371436 | 7.1806954658  | 6.7880344512  |
| H88  | -2.0171349006 | 6.1904037869  | 7.2052976849  |
| C89  | -2.4088568532 | 7.3224732860  | 5.4285696062  |
| H90  | -2.4658115066 | 6.4656987991  | 4.7678287880  |
| C91  | -3.9889615603 | 10.4444472843 | -1.6908507911 |
| H92  | -4.2634150431 | 10.9375695890 | -2.6176809435 |
| C93  | -4.9493749991 | 9.7743430354  | -0.9350174926 |
| H94  | -5.9807154072 | 9.7155312275  | -1.2655442958 |
| C95  | -4.5834335961 | 9.2038388648  | 0.2765745283  |
| H96  | -5.3048990041 | 8.7262539459  | 0.9277714348  |

Transition state structure of [Ru<sup>V</sup>(bda)(py)<sub>2</sub>-O]<sup>+</sup> dimer (O-O distance 1.9 Å)

E (B3LYP-D3/LACV3P<sup>\*\*\*</sup>) (a.u.) = -3074.544809

G<sub>solv</sub> (kcal/mol) = -129.533

ZPE (kcal/mol) = 444.486

ΔH<sub>298</sub> (kcal/mol) = 34.112

ΔS<sub>298</sub> (cal/(K•mol)) = 298.64

XYZ coordinate

|     |               |               |               |
|-----|---------------|---------------|---------------|
| O1  | -3.9506661041 | 11.5614072088 | 2.1269220978  |
| Ru2 | -5.0690009441 | 12.8125698864 | 2.7205418159  |
| C3  | -9.0329519985 | 15.5801216990 | 1.4554725977  |
| C4  | -8.5050128246 | 14.6243711714 | 0.5902059257  |
| C5  | -7.3702752149 | 13.9264053679 | 0.9898068958  |
| N6  | -6.7905567178 | 14.1199708460 | 2.1814837920  |
| C7  | -7.2765935573 | 15.0622922637 | 3.0216728841  |
| C8  | -8.4024968399 | 15.8124868049 | 2.6790411368  |
| H9  | -9.9162246878 | 16.1483700097 | 1.1817883871  |
| H10 | -8.9246042429 | 14.4046364619 | -0.3855743789 |
| H11 | -8.7847697790 | 16.5629194658 | 3.3614788302  |
| C12 | -4.9482708117 | 15.0822888736 | 6.5344098173  |
| C13 | -6.5092351975 | 15.1802250908 | 4.2610160254  |
| N14 | -5.5378233196 | 14.2483561135 | 4.3718765842  |
| C15 | -4.8013813214 | 14.1795780778 | 5.4873369741  |
| H16 | -4.3172296834 | 14.9627756572 | 7.4083778445  |
| C17 | -6.6381949416 | 12.9499537492 | 0.1160044599  |
| O18 | -7.0743328588 | 12.5809410720 | -0.9618724932 |
| C19 | -3.9075488078 | 12.9751643550 | 5.5392743487  |
| O20 | -3.2213892781 | 12.7111727439 | 6.5144342508  |
| O21 | -5.5010561024 | 12.5926835768 | 0.6475859071  |
| O22 | -4.0241680794 | 12.2382707585 | 4.4740021383  |
| N23 | -6.5208346104 | 11.3398683319 | 3.2427378459  |
| C24 | -6.8705231411 | 10.4112532982 | 2.3294963521  |
| C25 | -7.5827111362 | 9.2701654556  | 2.6738247546  |
| H26 | -6.5307848127 | 10.5912373657 | 1.3190436554  |
| H27 | -7.7889622947 | 8.5163244563  | 1.9223981927  |
| N28 | -3.4926179155 | 14.1666528342 | 2.2681676762  |
| C29 | -3.6987971560 | 15.3601713101 | 1.6785563590  |
| C30 | -2.6520381933 | 16.2349717775 | 1.4191768751  |
| H31 | -4.7215884128 | 15.6005266213 | 1.4121850512  |
| H32 | -2.8551033077 | 17.1890162849 | 0.9448059445  |
| C33 | -5.9141085850 | 16.0801413253 | 6.4155168189  |
| H34 | -6.0590704972 | 16.8080324063 | 7.2075560349  |
| C35 | -6.7167768767 | 16.1182860583 | 5.2746201311  |
| H36 | -7.4951022013 | 16.8659798154 | 5.1747533967  |
| C37 | -7.9662556197 | 9.0931264690  | 4.0012811645  |
| H38 | -8.5137202646 | 8.2053865227  | 4.3019105404  |
| C39 | -7.6259090290 | 10.0688664764 | 4.9392391802  |
| H40 | -7.9059833513 | 9.9723035904  | 5.9825486988  |
| C41 | -6.8904809440 | 11.1717792501 | 4.5276600134  |
| H42 | -6.5698264831 | 11.9300577246 | 5.2296636270  |
| C43 | -1.3537230639 | 15.8600953566 | 1.7736720834  |
| H44 | -0.5191576235 | 16.5278790961 | 1.5828569133  |
| C45 | -1.1476171602 | 14.6165427021 | 2.3690737747  |
| H46 | -0.1628740057 | 14.2647839267 | 2.6576860132  |
| C47 | -2.2393056064 | 13.7891964748 | 2.6040903748  |
| H48 | -2.1229664362 | 12.8100100427 | 3.0529450215  |
| O49 | -4.0532357954 | 9.9705588680  | 3.1606921437  |

|      |               |               |               |
|------|---------------|---------------|---------------|
| Ru50 | -2.8393245957 | 8.7639492533  | 2.6755158311  |
| C51  | 2.0255088255  | 7.6112744100  | 2.8214716633  |
| C52  | 1.5706414067  | 8.8886982482  | 3.1461972355  |
| C53  | 0.2103720084  | 9.1535985357  | 3.0322255245  |
| N54  | -0.6688544495 | 8.2236432864  | 2.6408238026  |
| C55  | -0.2379605276 | 6.9961931611  | 2.2758340089  |
| C56  | 1.1147750754  | 6.6579665010  | 2.3620938775  |
| H57  | 3.0790315763  | 7.3628350737  | 2.9025145707  |
| H58  | 2.2253915524  | 9.6914588444  | 3.4678238570  |
| H59  | 1.4502942165  | 5.6687376467  | 2.0735909275  |
| C60  | -3.5508553508 | 4.7419042083  | 0.9695970919  |
| C61  | -1.3152846121 | 6.1358179562  | 1.7885666748  |
| N62  | -2.5407920850 | 6.6932639076  | 1.9163979173  |
| C63  | -3.6279297554 | 6.0052942223  | 1.5454037648  |
| H64  | -4.4751400396 | 4.2515916152  | 0.6837800049  |
| C65  | -0.3992470114 | 10.5146773023 | 3.2099954712  |
| O66  | 0.2667974668  | 11.4989726490 | 3.4894955058  |
| C67  | -4.9169919701 | 6.6946630323  | 1.8823599112  |
| O68  | -6.0017968794 | 6.2654851159  | 1.5271954656  |
| O69  | -1.6751179147 | 10.5127397351 | 2.9542861952  |
| O70  | -4.7139828643 | 7.7601622734  | 2.6065495595  |
| N71  | -2.6953652380 | 8.3652303411  | 4.7603701353  |
| C72  | -2.6674299996 | 9.4320917528  | 5.5891013384  |
| C73  | -2.5739841423 | 9.2765099158  | 6.9665501813  |
| H74  | -2.7375706618 | 10.4120658613 | 5.1337543828  |
| H75  | -2.5594603710 | 10.1675310101 | 7.5850527816  |
| N76  | -3.0023574861 | 9.3559912765  | 0.6327615760  |
| C77  | -1.9423995194 | 9.8883305460  | -0.0073083215 |
| C78  | -2.0736272619 | 10.5343013398 | -1.2287343619 |
| H79  | -0.9835965306 | 9.8057992943  | 0.4871337308  |
| H80  | -1.1951578247 | 10.9480951715 | -1.7121101908 |
| C81  | -2.2933485268 | 4.1649532602  | 0.8067730468  |
| H82  | -2.1884191273 | 3.1797482833  | 0.3637707093  |
| C83  | -1.1636395866 | 4.8634563312  | 1.2356521137  |
| H84  | -0.1761378757 | 4.4281875276  | 1.1349925379  |
| C85  | -2.5081048419 | 7.9906048992  | 7.5008960496  |
| H86  | -2.4314542684 | 7.8398650953  | 8.5734116291  |
| C87  | -2.5489432337 | 6.8941155193  | 6.6358313952  |
| H88  | -2.5108324430 | 5.8771026374  | 7.0108812624  |
| C89  | -2.6469838566 | 7.1189040528  | 5.2689313646  |
| H90  | -2.6955869697 | 6.3017297359  | 4.5585602511  |
| C91  | -3.3430347606 | 10.6605617210 | -1.7948479520 |
| H92  | -3.4790469515 | 11.1894993952 | -2.7329329694 |
| C93  | -4.4364055770 | 10.1068746284 | -1.1320804620 |
| H94  | -5.4440576473 | 10.2190417845 | -1.5163992313 |
| C95  | -4.2263323632 | 9.4527501749  | 0.0745291121  |
| H96  | -5.0404203577 | 9.0236432331  | 0.6420317778  |

Product structure of [Ru<sup>V</sup>(bda)(py)<sub>2</sub>-O]<sup>+</sup> dimer (O-O distance 1.4 Å)  
E (B3LYP-D3/LACV3P<sup>\*\*\*</sup>) (a.u.) = -3073.825172

XYZ coordinate

|      |                   |                  |                  |
|------|-------------------|------------------|------------------|
| O1   | -3.8800610000000  | 11.5530420000000 | 2.2832010000000  |
| Ru2  | -5.1408800000000  | 12.8564740000000 | 2.8899790000000  |
| C3   | -9.1764050000000  | 15.3724480000000 | 1.4997300000000  |
| C4   | -8.5827640000000  | 14.4337050000000 | 0.6577880000000  |
| C5   | -7.4243810000000  | 13.7987030000000 | 1.0892700000000  |
| N6   | -6.8828250000000  | 14.0363050000000 | 2.2914530000000  |
| C7   | -7.4266020000000  | 14.9685670000000 | 3.1061940000000  |
| C8   | -8.5816070000000  | 15.6561980000000 | 2.7296070000000  |
| H9   | -10.0812940000000 | 15.8914340000000 | 1.2004540000000  |
| H10  | -8.9692440000000  | 14.1835190000000 | -0.3242880000000 |
| H11  | -9.0118900000000  | 16.3999410000000 | 3.3898610000000  |
| C12  | -5.1188300000000  | 15.1521290000000 | 6.6276080000000  |
| C13  | -6.6781310000000  | 15.1430980000000 | 4.3488770000000  |
| N14  | -5.6528610000000  | 14.2712510000000 | 4.4707020000000  |
| C15  | -4.9174490000000  | 14.2506250000000 | 5.5900830000000  |
| H16  | -4.4844120000000  | 15.0767440000000 | 7.5042870000000  |
| C17  | -6.6116630000000  | 12.8605340000000 | 0.2473220000000  |
| O18  | -6.9792630000000  | 12.4675570000000 | -0.8477050000000 |
| C19  | -3.9674810000000  | 13.0919020000000 | 5.6527680000000  |
| O20  | -3.2401080000000  | 12.8796410000000 | 6.6072490000000  |
| O21  | -5.4784450000000  | 12.5685330000000 | 0.8271330000000  |
| O22  | -4.0923440000000  | 12.3185060000000 | 4.6084030000000  |
| N23  | -6.5463600000000  | 11.3421860000000 | 3.4243770000000  |
| C24  | -6.8682800000000  | 10.3875090000000 | 2.5310080000000  |
| C25  | -7.6134150000000  | 9.2673490000000  | 2.8752290000000  |
| H26  | -6.4885090000000  | 10.5268720000000 | 1.5293870000000  |
| H27  | -7.7836280000000  | 8.4956040000000  | 2.1334230000000  |
| N28  | -3.5973250000000  | 14.2276230000000 | 2.3941490000000  |
| C29  | -3.8394530000000  | 15.4111850000000 | 1.7962760000000  |
| C30  | -2.8163120000000  | 16.2961630000000 | 1.4841740000000  |
| H31  | -4.8746000000000  | 15.6355760000000 | 1.5652190000000  |
| H32  | -3.0511710000000  | 17.2397770000000 | 1.0035230000000  |
| C33  | -6.1426470000000  | 16.0901310000000 | 6.4993740000000  |
| H34  | -6.3331780000000  | 16.8124090000000 | 7.2867550000000  |
| C35  | -6.9436730000000  | 16.0724260000000 | 5.3571380000000  |
| H36  | -7.7669010000000  | 16.7694970000000 | 5.2506590000000  |
| C37  | -8.0576740000000  | 9.1379800000000  | 4.1884520000000  |
| H38  | -8.6367780000000  | 8.2714120000000  | 4.4919610000000  |
| C39  | -7.7354700000000  | 10.1343060000000 | 5.1124230000000  |
| H40  | -8.0583310000000  | 10.0722560000000 | 6.1460800000000  |
| C41  | -6.9686870000000  | 11.2145000000000 | 4.6986410000000  |
| H42  | -6.6682460000000  | 11.9899040000000 | 5.3912750000000  |
| C43  | -1.4996720000000  | 15.9449390000000 | 1.7936980000000  |
| H44  | -0.6823150000000  | 16.6202500000000 | 1.5599040000000  |
| C45  | -1.2549340000000  | 14.7149050000000 | 2.4010290000000  |
| H46  | -0.2552880000000  | 14.3791220000000 | 2.6562550000000  |
| C47  | -2.3264890000000  | 13.8780120000000 | 2.6891830000000  |
| H48  | -2.1767760000000  | 12.9055520000000 | 3.1381450000000  |
| O49  | -3.9331770000000  | 10.3621160000000 | 3.0172820000000  |
| Ru50 | -2.6900210000000  | 9.0316070000000  | 2.4411200000000  |
| C51  | 2.0663910000000   | 7.6788060000000  | 2.5583940000000  |
| C52  | 1.6645860000000   | 8.9622560000000  | 2.9291060000000  |
| C53  | 0.3176690000000   | 9.2885310000000  | 2.8258370000000  |
| N54  | -0.5988020000000  | 8.4058860000000  | 2.4090140000000  |

|     |                  |                  |                  |
|-----|------------------|------------------|------------------|
| C55 | -0.2200030000000 | 7.1758820000000  | 1.9952340000000  |
| C56 | 1.1181920000000  | 6.7813600000000  | 2.0647100000000  |
| H57 | 3.1088770000000  | 7.3850940000000  | 2.6281880000000  |
| H58 | 2.3530700000000  | 9.7251410000000  | 3.2764320000000  |
| H59 | 1.4121720000000  | 5.7913600000000  | 1.7357280000000  |
| C60 | -3.6481460000000 | 5.1504270000000  | 0.6206390000000  |
| C61 | -1.3349340000000 | 6.3878800000000  | 1.4761170000000  |
| N62 | -2.5272110000000 | 7.0074600000000  | 1.6238610000000  |
| C63 | -3.6543870000000 | 6.3945400000000  | 1.2401610000000  |
| H64 | -4.5987660000000 | 4.7187900000000  | 0.3264560000000  |
| C65 | -0.2393950000000 | 10.6673400000000 | 3.0345850000000  |
| O66 | 0.4448380000000  | 11.6149960000000 | 3.3767360000000  |
| C67 | -4.8951160000000 | 7.1389590000000  | 1.6364270000000  |
| O68 | -6.0134590000000 | 6.7818140000000  | 1.3064110000000  |
| O69 | -1.5073020000000 | 10.7218500000000 | 2.7214870000000  |
| O70 | -4.6083930000000 | 8.1592520000000  | 2.3993290000000  |
| N71 | -2.5975050000000 | 8.6050360000000  | 4.5224090000000  |
| C72 | -2.5393020000000 | 9.6469190000000  | 5.3790110000000  |
| C73 | -2.5075980000000 | 9.4589910000000  | 6.7555830000000  |
| H74 | -2.5499410000000 | 10.6374480000000 | 4.9469760000000  |
| H75 | -2.4748690000000 | 10.3357100000000 | 7.3936400000000  |
| N76 | -2.8454210000000 | 9.6532940000000  | 0.4129850000000  |
| C77 | -1.7477050000000 | 9.9698990000000  | -0.3037850000000 |
| C78 | -1.8374450000000 | 10.5450460000000 | -1.5633230000000 |
| H79 | -0.7895630000000 | 9.7675500000000  | 0.1585390000000  |
| H80 | -0.9308830000000 | 10.7827420000000 | -2.1095570000000 |
| C81 | -2.4237520000000 | 4.5117780000000  | 0.4291200000000  |
| H82 | -2.3756370000000 | 3.5385540000000  | -0.0488250000000 |
| C83 | -1.2554810000000 | 5.1287630000000  | 0.8787550000000  |
| H84 | -0.2940910000000 | 4.6415750000000  | 0.7624400000000  |
| C85 | -2.5317440000000 | 8.1611750000000  | 7.2628780000000  |
| H86 | -2.5051400000000 | 7.9836080000000  | 8.3337540000000  |
| C87 | -2.5978140000000 | 7.0879380000000  | 6.3706830000000  |
| H88 | -2.6280900000000 | 6.0618740000000  | 6.7213600000000  |
| C89 | -2.6336920000000 | 7.3493220000000  | 5.0075990000000  |
| H90 | -2.7014650000000 | 6.5497830000000  | 4.2782670000000  |
| C91 | -3.1002850000000 | 10.8258050000000 | -2.0914100000000 |
| H92 | -3.1968640000000 | 11.2967980000000 | -3.0647790000000 |
| C93 | -4.2321370000000 | 10.5049740000000 | -1.3457180000000 |
| H94 | -5.2331870000000 | 10.7530360000000 | -1.6812040000000 |
| C95 | -4.0627630000000 | 9.9108450000000  | -0.1017460000000 |
| H96 | -4.9038280000000 | 9.6541960000000  | 0.5247350000000  |



Pre-reactive structure of  $[\text{Fe}^{\text{V}}(\text{bda})(\text{py})_2\text{-O}]^+$  dimer (O-O distance 2.5 Å)

E (B3LYP-D3/LACV3P\*\*\*) (a.u.) = -3133.587120

$G_{\text{solv}}$  (kcal/mol) = -125.180

ZPE (kcal/mol) = 444.402

$\Delta H_{298}$  (kcal/mol) = 34.665

$\Delta S_{298}$  (cal/(K•mol)) = 303.674

XYZ coordinate

|     |               |               |               |
|-----|---------------|---------------|---------------|
| O1  | -2.0739242089 | 7.4791546230  | 2.4611895195  |
| Fe2 | -3.2858957305 | 8.4886651067  | 1.8062577924  |
| C3  | -7.5163038427 | 9.0782431642  | -0.7991334601 |
| C4  | -6.8483962112 | 7.8572541033  | -0.6913868815 |
| C5  | -5.6397843868 | 7.8408685095  | 0.0011131946  |
| N6  | -5.1255629362 | 8.9297089573  | 0.5620084425  |
| C7  | -5.7441326855 | 10.1176088853 | 0.4521943761  |
| C8  | -6.9564152460 | 10.2272796209 | -0.2325454405 |
| H9  | -8.4616903357 | 9.1419447205  | -1.3289146006 |
| H10 | -7.2227652134 | 6.9380269383  | -1.1277677517 |
| H11 | -7.4550025104 | 11.1864465917 | -0.3199504068 |
| C12 | -3.2974795178 | 12.9070645233 | 2.4766771792  |
| C13 | -4.9903304611 | 11.2015892017 | 1.1116796956  |
| N14 | -3.9508299881 | 10.7218553368 | 1.8059799722  |
| C15 | -3.1368216935 | 11.5218184654 | 2.4742651467  |
| H16 | -2.5997929493 | 13.5281316133 | 3.0275000488  |
| C17 | -4.7420715853 | 6.6398078660  | 0.1305217671  |
| O18 | -5.0336083299 | 5.5570904967  | -0.3517071811 |
| C19 | -2.0712069064 | 10.7590475128 | 3.2287868635  |
| O20 | -1.1327315457 | 11.3088272019 | 3.7687509643  |
| O21 | -3.6106740466 | 6.9018197092  | 0.7426245394  |
| O22 | -2.3294335880 | 9.4635009659  | 3.2607801334  |
| N23 | -4.6033303957 | 7.8969732363  | 3.1616067252  |
| C24 | -4.7186669064 | 6.5756583645  | 3.3979173394  |
| C25 | -5.5921699497 | 6.0878685514  | 4.3622041065  |
| H26 | -4.0890581812 | 5.9134989823  | 2.8205462999  |
| H27 | -5.6368376947 | 5.0162045026  | 4.5174662005  |
| N28 | -2.0108653483 | 9.1181469832  | 0.3724639942  |
| C29 | -2.3723146696 | 9.1623575878  | -0.9228492633 |
| C30 | -1.4734320060 | 9.4981424670  | -1.9278043493 |
| H31 | -3.4004799371 | 8.9174582371  | -1.1457189602 |
| H32 | -1.8083610599 | 9.5217121899  | -2.9591430248 |
| C33 | -4.3781878115 | 13.4307672826 | 1.7617811731  |
| H34 | -4.5486224886 | 14.5026805102 | 1.7397563822  |
| C35 | -5.2459197873 | 12.5749897832 | 1.0731230490  |
| H36 | -6.0890792245 | 12.9706483274 | 0.5174293897  |
| C37 | -6.3601827544 | 6.9878697910  | 5.0988897071  |
| H38 | -7.0524296697 | 6.6343663903  | 5.8570467910  |
| C39 | -6.2161604887 | 8.3565576609  | 4.8584557805  |
| H40 | -6.7812771291 | 9.0929883625  | 5.4196887891  |
| C41 | -5.3200300622 | 8.7777655469  | 3.8860762066  |
| H42 | -5.1551241397 | 9.8245695808  | 3.6736728028  |
| C43 | -0.1533924339 | 9.7892723256  | -1.5848480683 |
| H44 | 0.5721215440  | 10.0500149415 | -2.3490529931 |
| C45 | 0.2184305617  | 9.7306437392  | -0.2417819829 |
| H46 | 1.2351548084  | 9.9424683046  | 0.0712192155  |
| C47 | -0.7331375481 | 9.3848236747  | 0.7091359025  |
| H48 | -0.4880576572 | 9.2951798804  | 1.7589748724  |
| O49 | -0.9353073768 | 6.0664827974  | 0.7413321903  |

|      |               |               |               |
|------|---------------|---------------|---------------|
| Fe50 | -0.2588754456 | 4.7524475829  | 1.4285329418  |
| C51  | 4.2002677363  | 1.9313786058  | 2.0763035562  |
| C52  | 4.0923727637  | 3.0728646860  | 1.2789857408  |
| C53  | 2.8293130521  | 3.6545371550  | 1.1679386868  |
| N54  | 1.7598552603  | 3.1769823093  | 1.7883923309  |
| C55  | 1.8455741554  | 2.0813791437  | 2.5503140131  |
| C56  | 3.0675658850  | 1.4207635193  | 2.7183664433  |
| H57  | 5.1591620688  | 1.4370716789  | 2.1975031467  |
| H58  | 4.9361752929  | 3.5053453616  | 0.7528966363  |
| H59  | 3.1400330365  | 0.5335273136  | 3.3381961414  |
| C60  | -2.0305406501 | 1.3269714358  | 4.0809681222  |
| C61  | 0.5380543697  | 1.7050176606  | 3.1403869142  |
| N62  | -0.4016665634 | 2.6304914819  | 2.9165217874  |
| C63  | -1.6355625462 | 2.4616269830  | 3.3713480454  |
| H64  | -3.0534606999 | 1.2368360250  | 4.4285200611  |
| C65  | 2.5118188070  | 4.8521341462  | 0.3317411237  |
| O66  | 3.3467602104  | 5.4822074548  | -0.2845414476 |
| C67  | -2.5241812615 | 3.6345090546  | 3.0842324080  |
| O68  | -3.6936534508 | 3.6653821896  | 3.4429668746  |
| O69  | 1.2197683141  | 5.1924439954  | 0.2914691015  |
| O70  | -1.9499904376 | 4.6426214091  | 2.4575069705  |
| N71  | 0.5382354973  | 5.8874022389  | 2.9041401463  |
| C72  | 1.1797853552  | 7.0223361498  | 2.5611121261  |
| C73  | 1.6039598631  | 7.9291894921  | 3.5227325433  |
| H74  | 1.3307299082  | 7.1765106688  | 1.4995533751  |
| H75  | 2.1173889611  | 8.8343271348  | 3.2166709222  |
| N76  | -1.1047875336 | 3.5782472464  | 0.0508969110  |
| C77  | -0.4232595013 | 2.5805495602  | -0.5437406956 |
| C78  | -1.0228754850 | 1.7884611558  | -1.5133101977 |
| H79  | 0.6002622061  | 2.4407340423  | -0.2249519530 |
| H80  | -0.4531426780 | 0.9907178961  | -1.9771347429 |
| C81  | -1.0618899774 | 0.3493220299  | 4.3171151428  |
| H82  | -1.3173701710 | -0.5527280282 | 4.8643544850  |
| C83  | 0.2433064317  | 0.5354935707  | 3.8504032555  |
| H84  | 1.0040036195  | -0.2154929207 | 4.0307859938  |
| C85  | 1.3504621020  | 7.6583100539  | 4.8680894334  |
| H86  | 1.6596323432  | 8.3584451941  | 5.6378228990  |
| C87  | 0.6907265129  | 6.4772251549  | 5.2080105265  |
| H88  | 0.4747203745  | 6.2266978495  | 6.2408073185  |
| C89  | 0.2905355905  | 5.6123319093  | 4.1970395006  |
| H90  | -0.2410290968 | 4.6937095207  | 4.3980379769  |
| C91  | -2.3483095828 | 2.0437236440  | -1.8747467807 |
| H92  | -2.8345136784 | 1.4375208551  | -2.6330727567 |
| C93  | -3.0343499213 | 3.0878997299  | -1.2552596414 |
| H94  | -4.0603176329 | 3.3415769173  | -1.4964759082 |
| C95  | -2.3821523844 | 3.8443975164  | -0.2913914266 |
| H96  | -2.8678532948 | 4.6646809635  | 0.2192191704  |

Transition state structure of [Fe<sup>V</sup>(bda)(py)<sub>2</sub>-O]<sup>+</sup> dimer (O-O distance 2.1 Å)

E (B3LYP-D3/LACV3P<sup>\*\*\*</sup>) (a.u.) = -3133.585527

G<sub>solv</sub> (kcal/mol) = -124.862

ZPE (kcal/mol) = 444.444

ΔH<sub>298</sub> (kcal/mol) = 34.151

ΔS<sub>298</sub> (cal/(K•mol)) = 298.35

XYZ coordinate

|     |               |               |               |
|-----|---------------|---------------|---------------|
| O1  | -1.9128060380 | 7.2762751628  | 2.1222671600  |
| Fe2 | -3.1783928608 | 8.2504342934  | 1.4922122737  |
| C3  | -7.3095569862 | 9.1784614583  | -1.0852637465 |
| C4  | -6.7483825841 | 7.9054467592  | -0.9678258957 |
| C5  | -5.5528407733 | 7.7879845959  | -0.2644680639 |
| N6  | -4.9534306399 | 8.8318896498  | 0.3053317551  |
| C7  | -5.4699396024 | 10.0686866834 | 0.1868481162  |
| C8  | -6.6601025807 | 10.2763121170 | -0.5144953793 |
| H9  | -8.2400547508 | 9.3209601774  | -1.6259742457 |
| H10 | -7.1938928796 | 7.0198504861  | -1.4071486168 |
| H11 | -7.0740849209 | 11.2743998358 | -0.6094901419 |
| C12 | -2.8787096173 | 12.6579833304 | 2.2941114815  |
| C13 | -4.6500422112 | 11.0919142684 | 0.8640173846  |
| N14 | -3.6626736569 | 10.5335627555 | 1.5739829824  |
| C15 | -2.8126318933 | 11.2650507466 | 2.2763547103  |
| H16 | -2.1563268700 | 13.2233164462 | 2.8724268565  |
| C17 | -4.7566631379 | 6.5178146143  | -0.1366606757 |
| O18 | -5.1259664285 | 5.4552317965  | -0.6057084296 |
| C19 | -1.8267893458 | 10.4120821735 | 3.0455014544  |
| O20 | -0.8476616660 | 10.8808200119 | 3.5969705749  |
| O21 | -3.5993812109 | 6.6964891913  | 0.4621666283  |
| O22 | -2.1983708795 | 9.1498974068  | 3.0693779316  |
| N23 | -4.4769551705 | 7.6769650627  | 2.8660208912  |
| C24 | -4.5692840595 | 6.3644147758  | 3.1549318327  |
| C25 | -5.4329010816 | 5.9027733875  | 4.1412717101  |
| H26 | -3.9279461689 | 5.6937102942  | 2.6006804881  |
| H27 | -5.4597820477 | 4.8377978264  | 4.3391532401  |
| N28 | -1.9245901229 | 8.8601535299  | 0.0224601524  |
| C29 | -2.2738625394 | 8.8184867099  | -1.2759635102 |
| C30 | -1.3840438995 | 9.1528112586  | -2.2899460687 |
| H31 | -3.2828476197 | 8.5038244477  | -1.4976676313 |
| H32 | -1.7097403868 | 9.1057428009  | -3.3233493420 |
| C33 | -3.9019357777 | 13.2644351806 | 1.5601332373  |
| H34 | -3.9980635030 | 14.3457714775 | 1.5505557228  |
| C35 | -4.8099474389 | 12.4803407767 | 0.8384763275  |
| H36 | -5.6108626009 | 12.9414725231 | 0.2710258242  |
| C37 | -6.2135519495 | 6.8201476681  | 4.8421592162  |
| H38 | -6.8987990310 | 6.4861485940  | 5.6153311122  |
| C39 | -6.0938552548 | 8.1804472319  | 4.5455500262  |
| H40 | -6.6714390151 | 8.9293782034  | 5.0765375639  |
| C41 | -5.2073788716 | 8.5756662446  | 3.5545345503  |
| H42 | -5.0607431944 | 9.6150494652  | 3.2962781862  |
| C43 | -0.0855123440 | 9.5327371118  | -1.9533100034 |
| H44 | 0.6324137526  | 9.7935912510  | -2.7245284533 |
| C45 | 0.2760313257  | 9.5608593296  | -0.6061803749 |
| H46 | 1.2774796113  | 9.8386100207  | -0.2956822666 |
| C47 | -0.6658757210 | 9.2123803896  | 0.3523954027  |
| H48 | -0.4211166898 | 9.1848613601  | 1.4049115108  |
| O49 | -1.0623158466 | 5.9363023864  | 0.7470803506  |

|      |               |               |               |
|------|---------------|---------------|---------------|
| Fe50 | -0.2864892237 | 4.6542295417  | 1.4611192264  |
| C51  | 4.3205475834  | 2.1082699850  | 2.0643337037  |
| C52  | 4.1357044240  | 3.2376083233  | 1.2645332204  |
| C53  | 2.8401410027  | 3.7447258328  | 1.1673193931  |
| N54  | 1.8063644684  | 3.2098201320  | 1.8030190555  |
| C55  | 1.9660370658  | 2.1216467530  | 2.5658816184  |
| C56  | 3.2269034499  | 1.5348148869  | 2.7202101927  |
| H57  | 5.3081484365  | 1.6719503614  | 2.1762831544  |
| H58  | 4.9453744533  | 3.7173925263  | 0.7261245726  |
| H59  | 3.3576678085  | 0.6549268894  | 3.3408070849  |
| C60  | -1.8423113545 | 1.1377897331  | 4.1394722698  |
| C61  | 0.6920232375  | 1.6648542887  | 3.1728276018  |
| N62  | -0.3081821370 | 2.5215861902  | 2.9464374000  |
| C63  | -1.5257007736 | 2.2853627939  | 3.4119935917  |
| H64  | -2.8545418209 | 0.9860364607  | 4.4964901551  |
| C65  | 2.4512568466  | 4.9192696494  | 0.3278040775  |
| O66  | 3.2464260601  | 5.5876820968  | -0.3008111990 |
| C67  | -2.4851556563 | 3.3991531475  | 3.1132681788  |
| O68  | -3.6553921870 | 3.3628038220  | 3.4649879071  |
| O69  | 1.1434854762  | 5.1890519528  | 0.3023318360  |
| O70  | -1.9692799639 | 4.4386689546  | 2.4828187897  |
| N71  | 0.4554726335  | 5.8440642377  | 2.9276840152  |
| C72  | 1.0372560217  | 7.0089322077  | 2.5763804452  |
| C73  | 1.3569326281  | 7.9711422205  | 3.5235422777  |
| H74  | 1.2126625422  | 7.1458546067  | 1.5166979303  |
| H75  | 1.8058503517  | 8.9070139437  | 3.2101319313  |
| N76  | -1.0846848087 | 3.4563459231  | 0.0576580209  |
| C77  | -0.3587772450 | 2.4903047190  | -0.5363951702 |
| C78  | -0.9093678461 | 1.6944212678  | -1.5318374772 |
| H79  | 0.6622614370  | 2.3797966767  | -0.1976017384 |
| H80  | -0.3030445666 | 0.9235438497  | -1.9948143071 |
| C81  | -0.8102856041 | 0.2279191563  | 4.3804599639  |
| H82  | -1.0035030199 | -0.6808380738 | 4.9418324694  |
| C83  | 0.4777049139  | 0.4891982854  | 3.9015057834  |
| H84  | 1.2856309596  | -0.2090910534 | 4.0879951969  |
| C85  | 1.0648675172  | 7.7231188363  | 4.8649712344  |
| H86  | 1.2837693168  | 8.4703201793  | 5.6211090975  |
| C87  | 0.4816796716  | 6.5060511429  | 5.2172952037  |
| H88  | 0.2439405457  | 6.2698718724  | 6.2486651708  |
| C89  | 0.1803178195  | 5.5875703302  | 4.2192124707  |
| H90  | -0.2974698484 | 4.6412990189  | 4.4284763051  |
| C91  | -2.2336182968 | 1.9126552100  | -1.9208039433 |
| H92  | -2.6814541078 | 1.3048604394  | -2.7011415696 |
| C93  | -2.9682439863 | 2.9227683764  | -1.3003991928 |
| H94  | -3.9954030428 | 3.1480776124  | -1.5651096261 |
| C95  | -2.3637781486 | 3.6831990050  | -0.3086765162 |
| H96  | -2.8838294245 | 4.4841095140  | 0.1989041204  |

Product structure of  $[\text{Fe}^{\text{V}}(\text{bda})(\text{py})_2\text{-O}]^+$  dimer (O-O distance 1.2 Å)  
E (B3LYP-D3/LACV3P\*\*+) (a.u.) = -3132.916398

XYZ coordinate

|      |                  |                  |                  |
|------|------------------|------------------|------------------|
| O1   | -3.3510089085447 | 10.8720144048234 | 2.1213594573362  |
| Fe2  | -5.1356608138623 | 12.8416563101569 | 2.8963154645607  |
| C3   | -9.0756105407525 | 15.4632907322357 | 1.3811963380470  |
| C4   | -8.4344867462458 | 14.5314632047830 | 0.5600615594432  |
| C5   | -7.3047302401573 | 13.8955629149471 | 1.0717862747888  |
| N6   | -6.8510759366544 | 14.1513964144821 | 2.2925096648067  |
| C7   | -7.4455368439594 | 15.0440959496687 | 3.0981374697140  |
| C8   | -8.5806909547210 | 15.7328868896449 | 2.6623019817168  |
| H9   | -9.9600896743473 | 15.9835984051110 | 1.0269091918260  |
| H10  | -8.7790025651961 | 14.2954354426619 | -0.4401854794437 |
| H11  | -9.0729744002291 | 16.4572259143020 | 3.3016724714858  |
| C12  | -5.2389111479089 | 14.9568989299520 | 6.7194905640941  |
| C13  | -6.7571954623682 | 15.1454416096456 | 4.4090003751736  |
| N14  | -5.7635764692088 | 14.2504338860850 | 4.5131234838759  |
| C15  | -5.0302396983914 | 14.1336939630963 | 5.6131542486929  |
| H16  | -4.6220653995172 | 14.8387996141686 | 7.6035206737050  |
| C17  | -6.4475619245178 | 12.8971643047383 | 0.3269417832875  |
| O18  | -6.7191570610213 | 12.5680299758783 | -0.8172926023720 |
| C19  | -4.0127486213070 | 13.0154695760402 | 5.5226674782087  |
| O20  | -3.2252510345466 | 12.7857658432658 | 6.4162147289039  |
| O21  | -5.4089307437652 | 12.4643596269848 | 1.0089519896306  |
| O22  | -4.0828918503717 | 12.3284050724481 | 4.3831058616867  |
| N23  | -6.4617239190453 | 11.4078549270381 | 3.3489871374201  |
| C24  | -6.5957863145878 | 10.3379177698375 | 2.5374692787867  |
| C25  | -7.4931445466560 | 9.3157581687012  | 2.8293145934146  |
| H26  | -5.9898031613292 | 10.3115279754408 | 1.6408062383125  |
| H27  | -7.5782674549159 | 8.4962963330116  | 2.1270718896905  |
| N28  | -3.6733645080849 | 14.1296420479470 | 2.3487357736936  |
| C29  | -3.9548219678070 | 15.1984139466475 | 1.5772666417559  |
| C30  | -2.9637008782047 | 16.0553398939890 | 1.1190841679974  |
| H31  | -4.9960866489751 | 15.3539862236258 | 1.3325761560955  |
| H32  | -3.2348244802349 | 16.9068053950347 | 0.5043910898673  |
| C33  | -6.2623584631695 | 15.9059936967487 | 6.6325395263673  |
| H34  | -6.4619029837058 | 16.5663957510928 | 7.4707231942445  |
| C35  | -7.0407835977617 | 16.0064624636336 | 5.4721514962283  |
| H36  | -7.8415266114497 | 16.7348765145155 | 5.4041553711726  |
| C37  | -8.2590952424447 | 9.3929463897885  | 3.9898537161843  |
| H38  | -8.9688895394683 | 8.6093867288929  | 4.2370064969314  |
| C39  | -8.1029707628100 | 10.4964256909448 | 4.8310007530271  |
| H40  | -8.6744976878210 | 10.5977414839438 | 5.7473798321857  |
| C41  | -7.1956815146007 | 11.4840698535599 | 4.4787304770994  |
| H42  | -7.0405266651228 | 12.3553277251382 | 5.0981997589934  |
| C43  | -1.6353424319413 | 15.7977229535299 | 1.4608814862934  |
| H44  | -0.8397414667368 | 16.4503772403225 | 1.1151758497196  |
| C45  | -1.3484717635130 | 14.6884711886254 | 2.2549662545170  |
| H46  | -0.3321372830521 | 14.4484773814390 | 2.5473075496146  |
| C47  | -2.3915084442558 | 13.8757142651664 | 2.6833178965270  |
| H48  | -2.2281826697813 | 13.0103794083230 | 3.3135399286150  |
| O49  | -2.8104190403001 | 11.0419024213220 | 1.0635778286725  |
| Fe50 | -2.7637078825387 | 8.9144346528459  | -0.6774334340310 |
| C51  | 0.3554767432609  | 6.0518871929544  | -3.3501866561079 |
| C52  | 0.7787260505360  | 7.1863802083082  | -2.6511091339499 |
| C53  | -0.1927375892274 | 7.9134565443446  | -1.9630378891877 |
| N54  | -1.4656696447945 | 7.5417451187756  | -1.9599805955864 |

C55 -1.8996704390945 6.4654863563351 -2.6304586903657  
C56 -0.9954088461921 5.6816971489252 -3.3514397977419  
H57 1.0749583340970 5.4552438981406 -3.9023812984402  
H58 1.8122684073695 7.5139383542465 -2.6348345454888  
H59 -1.3274945600308 4.8071777958096 -3.9007844680597  
C60 -6.0993316978209 6.3472006080016 -2.0082645665915  
C61 -3.3705011790155 6.2952824646887 -2.5016952642274  
N62 -3.9055287101363 7.1931174199096 -1.6622328268644  
C63 -5.2070351367097 7.2339952942547 -1.4072538347277  
H64 -7.1576300967882 6.4083587482163 -1.7813644297411  
C65 0.0469835598104 9.1918313292802 -1.1877520179003  
O66 1.1547708164822 9.6616853571175 -1.0426898692031  
C67 -5.5754249692449 8.2949473418000 -0.3923652391109  
O68 -6.7290915051685 8.4362777643982 -0.0190533744826  
O69 -1.0661803287876 9.7366858490021 -0.6942521019105  
O70 -4.5548962575711 9.0010276039520 0.0524785548022  
N71 -2.2058348385746 7.8712887465553 0.9819234461492  
C72 -1.2617259117828 8.3639367192898 1.8093992728400  
C73 -0.9012181253200 7.7086790463186 2.9808687219321  
H74 -0.7975683100686 9.2918940340071 1.4994743396503  
H75 -0.1362855245435 8.1389250053734 3.6179512875515  
N76 -3.3456449246722 10.0924788255542 -2.2019311456443  
C77 -2.7740472939206 9.9779622137981 -3.4191835425809  
C78 -3.1432159623940 10.7909328518198 -4.4797954012395  
H79 -2.0130228517079 9.2186804371762 -3.5247247103721  
H80 -2.6611167582087 10.6649741241807 -5.4431029990006  
C81 -5.5684829440824 5.4024766483347 -2.8915495040503  
H82 -6.2240409513583 4.6921128088629 -3.3858485727652  
C83 -4.1919332296461 5.3644118785355 -3.1434823439334  
H84 -3.7775982394823 4.6315143537809 -3.8269929243516  
C85 -1.5313600560988 6.5087144654877 3.3075223398082  
H86 -1.2664946955282 5.9747014748006 4.2147170269114  
C87 -2.5085234906951 6.0050474923503 2.4475501878186  
H88 -3.0250036485714 5.0752946260083 2.6604225644834  
C89 -2.8223203509043 6.7149398418305 1.2967580492209  
H90 -3.5751001369262 6.3679203620403 0.6031160040356  
C91 -4.1333375930020 11.7547320719580 -4.2779541808578  
H92 -4.4465990238403 12.3997894715721 -5.0933177375111  
C93 -4.7130663477461 11.8734977637118 -3.0174954146362  
H94 -5.4942551086930 12.5905679811419 -2.7999462925534  
C95 -4.2938579697465 11.0290088404456 -1.9944370334567  
H96 -4.7276547291989 11.0866629873843 -1.0047976301146

Pre-reactive structure of 6-coordinate [Fe<sup>V</sup>(bda)(py)<sub>2</sub>-O]<sup>+</sup> dimer (O-O distance 3.3 Å)

E (B3LYP-D3/LACV3P<sup>\*\*\*</sup>) (a.u.) = -3133.613788

G<sub>solv</sub> (kcal/mol) = -125.157

ZPE (kcal/mol) = 443.160

ΔH<sub>298</sub> (kcal/mol) = 34.866

ΔS<sub>298</sub> (cal/(K•mol)) = 303.698

XYZ coordinate

|     |               |               |               |
|-----|---------------|---------------|---------------|
| O1  | 0.3205799565  | 5.5596123951  | 1.1519143496  |
| Fe2 | 0.6513988852  | 4.5810419239  | 2.4123512228  |
| C3  | 1.8873085511  | 1.7389497707  | 5.9514363834  |
| C4  | 0.5681443355  | 2.1822151550  | 5.8159680764  |
| C5  | 0.2795229460  | 3.0338236184  | 4.7532448693  |
| N6  | 1.2295794279  | 3.3972691153  | 3.8954331397  |
| C7  | 2.5017541048  | 2.9942723524  | 3.9953317558  |
| C8  | 2.8730195380  | 2.1464586757  | 5.0429078635  |
| H9  | 2.1554165516  | 1.0747233990  | 6.7673990777  |
| H10 | -0.2219944049 | 1.8953130684  | 6.5010386881  |
| H11 | 3.8943075048  | 1.7990238960  | 5.1520098219  |
| C12 | 4.6840405305  | 4.5020923094  | 0.7035431693  |
| C13 | 3.3361618930  | 3.5156085199  | 2.8903044240  |
| N14 | 2.6380926810  | 4.1681476969  | 1.9199748001  |
| C15 | 3.2984210483  | 4.6163442908  | 0.8403666971  |
| H16 | 5.1692716724  | 4.9008880502  | -0.1805369368 |
| C17 | -1.0447053683 | 3.7060989113  | 4.4469247299  |
| O18 | -2.0237632482 | 3.5199583526  | 5.1511773413  |
| C19 | 2.5473756973  | 5.2411200880  | -0.3000022245 |
| O20 | 2.7875189162  | 6.4087684990  | -0.6861828596 |
| O21 | -0.9797004083 | 4.5263323497  | 3.4236708843  |
| O22 | 1.7538406101  | 4.5976635169  | -1.0386566426 |
| N23 | -0.0337731904 | 2.9955815268  | 1.4081235997  |
| C24 | -1.2903449381 | 3.1208530831  | 0.9368319453  |
| C25 | -1.9001734736 | 2.1064272627  | 0.2078280194  |
| H26 | -1.7973725521 | 4.0481301287  | 1.1651463697  |
| H27 | -2.9138698721 | 2.2663445932  | -0.1408945435 |
| N28 | 1.2628817557  | 6.2154177968  | 3.4761746092  |
| C29 | 0.8988477490  | 6.4262235351  | 4.7528061739  |
| C30 | 1.2332635152  | 7.5856706451  | 5.4413503111  |
| H31 | 0.3100047742  | 5.6554481261  | 5.2260947831  |
| H32 | 0.9055375671  | 7.7117054021  | 6.4671551459  |
| C33 | 5.4056752933  | 3.8602298492  | 1.7084545674  |
| H34 | 6.4828921401  | 3.7524115437  | 1.6317505524  |
| C35 | 4.7205890590  | 3.3463085194  | 2.8060307882  |
| H36 | 5.2531933689  | 2.8274446962  | 3.5953215958  |
| C37 | -1.1928071611 | 0.9323353272  | -0.0414909891 |
| H38 | -1.6441460732 | 0.1225521242  | -0.6069565576 |
| C39 | 0.1091755951  | 0.8096323511  | 0.4501824672  |
| H40 | 0.6955836365  | -0.0872542746 | 0.2817879242  |
| C41 | 0.6547866426  | 1.8628870388  | 1.1711580775  |
| H42 | 1.6581909542  | 1.8082937171  | 1.5733674113  |
| C43 | 1.9646162971  | 8.5725419670  | 4.7855430772  |
| H44 | 2.2286165995  | 9.4947448221  | 5.2922505600  |
| C45 | 2.3309328185  | 8.3596570416  | 3.4565719650  |
| H46 | 2.8886583716  | 9.1043972482  | 2.8990489275  |
| C47 | 1.9542639286  | 7.1777257501  | 2.8341282284  |
| H48 | 2.1738561481  | 6.9953682052  | 1.7903046419  |
| O49 | -1.4316715178 | 7.6703169213  | 2.9861826479  |

|      |               |               |               |
|------|---------------|---------------|---------------|
| Fe50 | -2.6760188669 | 7.6905138140  | 1.9341699555  |
| C51  | -6.2974969341 | 8.0329798929  | -1.0509144015 |
| C52  | -5.7515698243 | 6.7874511511  | -0.7256918774 |
| C53  | -4.6714361490 | 6.7658610191  | 0.1519833527  |
| N54  | -4.1898301337 | 7.8941293785  | 0.6671807160  |
| C55  | -4.6871449380 | 9.1022287235  | 0.3779423754  |
| C56  | -5.7655443845 | 9.2080746060  | -0.5047633697 |
| H57  | -7.1393813529 | 8.0952016137  | -1.7335926612 |
| H58  | -6.1295609871 | 5.8553594974  | -1.1309194780 |
| H59  | -6.1928903848 | 10.1715462736 | -0.7591015067 |
| C60  | -2.6334435728 | 12.0162253144 | 2.6454461735  |
| C61  | -3.9922436019 | 10.1792715717 | 1.1151876353  |
| N62  | -3.0944614483 | 9.7374894461  | 2.0393992459  |
| C63  | -2.4593199779 | 10.6393874468 | 2.8049870886  |
| H64  | -2.0794064255 | 12.7023508771 | 3.2765447014  |
| C65  | -3.8665173084 | 5.5576616823  | 0.5873943006  |
| O66  | -4.1423755726 | 4.4389848945  | 0.1845552324  |
| C67  | -1.5442937648 | 10.1835446813 | 3.9065398745  |
| O68  | -0.3288384660 | 10.4877701982 | 3.9289380110  |
| O69  | -2.8466764952 | 5.8685849317  | 1.3537416153  |
| O70  | -1.9592202972 | 9.6064745421  | 4.9481893797  |
| N71  | -3.9568926408 | 7.2392604312  | 3.3994754146  |
| C72  | -3.6557416989 | 6.1229907728  | 4.0924429332  |
| C73  | -4.4445497519 | 5.6871706469  | 5.1503319555  |
| H74  | -2.7734175301 | 5.5847143769  | 3.7742451002  |
| H75  | -4.1513481497 | 4.7800050202  | 5.6660672297  |
| N76  | -1.3482471543 | 8.0520780298  | 0.4234051136  |
| C77  | -1.4026664581 | 7.4133700517  | -0.7586049230 |
| C78  | -0.4347868822 | 7.5815411781  | -1.7419421124 |
| H79  | -2.2314060995 | 6.7380800056  | -0.9110616442 |
| H80  | -0.5180869676 | 7.0333364662  | -2.6740325272 |
| C81  | -3.5332817210 | 12.4717648930 | 1.6827717641  |
| H82  | -3.6928101527 | 13.5353133728 | 1.5373880830  |
| C83  | -4.2337284109 | 11.5415830135 | 0.9200695705  |
| H84  | -4.9508174080 | 11.8660658259 | 0.1747475946  |
| C85  | -5.5729443313 | 6.4248661332  | 5.5026479906  |
| H86  | -6.2082540358 | 6.1079540895  | 6.3241065376  |
| C87  | -5.8780248078 | 7.5811671967  | 4.7805200218  |
| H88  | -6.7469137276 | 8.1850271978  | 5.0192134674  |
| C89  | -5.0461303343 | 7.9562960097  | 3.7345422313  |
| H90  | -5.2466810620 | 8.8429335354  | 3.1465939256  |
| C91  | 0.6370279244  | 8.4360386997  | -1.4948293528 |
| H92  | 1.4163497899  | 8.5756796320  | -2.2368128273 |
| C93  | 0.6998957878  | 9.0891614975  | -0.2636186868 |
| H94  | 1.5222623780  | 9.7530118382  | -0.0181041057 |
| C95  | -0.3013944439 | 8.8647157684  | 0.6712035987  |
| H96  | -0.2625723826 | 9.3113121681  | 1.6561328837  |



Transition state structure of 6-coordinate [Fe<sup>V</sup>(bda)(py)<sub>2</sub>-O]<sup>+</sup> dimer (O-O distance 2.0 Å)

E (B3LYP-D3/LACV3P<sup>\*\*\*</sup>) (a.u.) = -3133.598323

G<sub>solv</sub> (kcal/mol) = -125.725

ZPE (kcal/mol) = 442.416

ΔH<sub>298</sub> (kcal/mol) = 34.533

ΔS<sub>298</sub> (cal/(K•mol)) = 301.500

XYZ coordinate

|     |               |              |               |
|-----|---------------|--------------|---------------|
| O1  | -0.2991292837 | 6.3579815444 | 1.9867701876  |
| Fe2 | 0.1154061366  | 5.2114995492 | 3.1324144024  |
| C3  | 1.3104280579  | 1.9609543512 | 6.2980253273  |
| C4  | -0.0276101498 | 2.3152773972 | 6.1020079363  |
| C5  | -0.3052005395 | 3.2911285233 | 5.1497581095  |
| N6  | 0.6761289010  | 3.8550249589 | 4.4465955891  |
| C7  | 1.9681253734  | 3.5519480018 | 4.6200029184  |
| C8  | 2.3264568976  | 2.5848165815 | 5.5632176171  |
| H9  | 1.5700085290  | 1.2031427387 | 7.0305586899  |
| H10 | -0.8423856447 | 1.8708959932 | 6.6628300416  |
| H11 | 3.3635781813  | 2.3134332139 | 5.7251351188  |
| C12 | 4.3099496905  | 5.8136026486 | 1.9231251801  |
| C13 | 2.8488778932  | 4.3261861207 | 3.7187309287  |
| N14 | 2.1904284876  | 5.0766195680 | 2.7921042257  |
| C15 | 2.9144403235  | 5.7700239889 | 1.8986603263  |
| H16 | 4.8407250031  | 6.4117859104 | 1.1904807243  |
| C17 | -1.6552779088 | 3.9116881487 | 4.8413570363  |
| O18 | -2.6612213212 | 3.5847515928 | 5.4469985972  |
| C19 | 2.2148481682  | 6.5033598463 | 0.7950948848  |
| O20 | 2.3690616163  | 7.7363408888 | 0.6136800638  |
| O21 | -1.5763916773 | 4.8585695814 | 3.9348936244  |
| O22 | 1.5356856189  | 5.9254527594 | -0.0930948997 |
| N23 | -0.2644169936 | 3.7404826710 | 1.8133763433  |
| C24 | -1.5069958226 | 3.7442506891 | 1.2930919919  |
| C25 | -1.9348596884 | 2.7684648872 | 0.3995316582  |
| H26 | -2.1594937275 | 4.5486183264 | 1.6012298859  |
| H27 | -2.9541948609 | 2.8224044356 | 0.0307489788  |
| N28 | 0.4871744246  | 6.6735750610 | 4.5035562119  |
| C29 | 0.0842718943  | 6.6041903073 | 5.7852518053  |
| C30 | 0.3814636875  | 7.5950447612 | 6.7131795525  |
| H31 | -0.4948636126 | 5.7378947354 | 6.0693709691  |
| H32 | 0.0327044980  | 7.4927060008 | 7.7349895997  |
| C33 | 4.9844941116  | 5.0661808762 | 2.8876033022  |
| H34 | 6.0687444226  | 5.0746357118 | 2.9323417756  |
| C35 | 4.2455760905  | 4.2983678053 | 3.7833299813  |
| H36 | 4.7430600085  | 3.6954032503 | 4.5340298389  |
| C37 | -1.0505465003 | 1.7595756512 | 0.0252722397  |
| H38 | -1.3550706027 | 0.9806950541 | -0.6671782300 |
| C39 | 0.2400024720  | 1.7634307148 | 0.5613791431  |
| H40 | 0.9631587142  | 0.9986026943 | 0.2994489809  |
| C41 | 0.5945139710  | 2.7665825221 | 1.4528586938  |
| H42 | 1.5818028630  | 2.7978696781 | 1.8951969849  |
| C43 | 1.1213114036  | 8.7034014183 | 6.3042180722  |
| H44 | 1.3724199656  | 9.4914848894 | 7.0072152735  |
| C45 | 1.5115816596  | 8.7896748347 | 4.9694193117  |
| H46 | 2.0485377541  | 9.6507112656 | 4.5901480538  |
| C47 | 1.1650540578  | 7.7650680047 | 4.0987436426  |
| H48 | 1.3986908841  | 7.8194650338 | 3.0443114429  |
| O49 | -1.6035928651 | 7.7132225146 | 2.6662524075  |

|      |               |               |               |
|------|---------------|---------------|---------------|
| Fe50 | -2.9974233555 | 7.8572336853  | 1.7527280903  |
| C51  | -6.9708398958 | 8.3441215517  | -0.6937006787 |
| C52  | -6.5058577354 | 7.0784662258  | -0.3236559055 |
| C53  | -5.3125234834 | 7.0110121114  | 0.3891715916  |
| N54  | -4.6487990395 | 8.1205048035  | 0.7110414038  |
| C55  | -5.0542556418 | 9.3454309288  | 0.3565898907  |
| C56  | -6.2417833466 | 9.4940621074  | -0.3650432331 |
| H57  | -7.8993161185 | 8.4406774089  | -1.2478529785 |
| H58  | -7.0290110301 | 6.1624760225  | -0.5756674324 |
| H59  | -6.6015340453 | 10.4727053458 | -0.6623212476 |
| C60  | -2.3204193079 | 12.2051382946 | 1.8478578652  |
| C61  | -4.1286805724 | 10.3967794590 | 0.8312399073  |
| N62  | -3.1512993483 | 9.9532242809  | 1.6693338900  |
| C63  | -2.2972088440 | 10.8506534901 | 2.1872637435  |
| H64  | -1.5887613533 | 12.8790310244 | 2.2801125583  |
| C65  | -4.5605540204 | 5.7586483977  | 0.8020439568  |
| O66  | -4.9610736897 | 4.6466804007  | 0.5059848962  |
| C67  | -1.2948155998 | 10.4117189514 | 3.2101459266  |
| O68  | -0.0619622113 | 10.5912622939 | 3.0487873170  |
| O69  | -3.4332976006 | 6.0322939750  | 1.4185568262  |
| O70  | -1.6158068976 | 9.9655942540  | 4.3418371714  |
| N71  | -4.1177039502 | 7.7631249612  | 3.4244489718  |
| C72  | -3.9638635397 | 6.6437299225  | 4.1582365328  |
| C73  | -4.6924868797 | 6.4178278367  | 5.3208009830  |
| H74  | -3.2345933801 | 5.9302177278  | 3.8033727236  |
| H75  | -4.5225695576 | 5.4908071763  | 5.8587128134  |
| N76  | -1.9097726925 | 7.9230627157  | 0.0297517858  |
| C77  | -2.2698865083 | 7.2753302763  | -1.0934110184 |
| C78  | -1.5340311033 | 7.3575549403  | -2.2691233896 |
| H79  | -3.1650778437 | 6.6729521746  | -1.0455692647 |
| H80  | -1.8674743332 | 6.8155379039  | -3.1474151742 |
| C81  | -3.3038636883 | 12.6558901053 | 0.9689118635  |
| H82  | -3.3541740134 | 13.7022867293 | 0.6857288216  |
| C83  | -4.2292254515 | 11.7435680973 | 0.4710877063  |
| H84  | -5.0144074152 | 12.0674213518 | -0.2025021871 |
| C85  | -5.6087854359 | 7.3787152105  | 5.7417398105  |
| H86  | -6.1967685474 | 7.2305588876  | 6.6423940496  |
| C87  | -5.7620105114 | 8.5411182540  | 4.9811386755  |
| H88  | -6.4628310601 | 9.3172621886  | 5.2695896487  |
| C89  | -5.0015264913 | 8.6964554057  | 3.8305036239  |
| H90  | -5.0969554505 | 9.5801045088  | 3.2131593177  |
| C91  | -0.3781154416 | 8.1362433016  | -2.2888117268 |
| H92  | 0.2153176194  | 8.2235767332  | -3.1934687647 |
| C93  | 0.0109112840  | 8.7830106120  | -1.1174371092 |
| H94  | 0.9234927763  | 9.3645300194  | -1.0671443990 |
| C95  | -0.7706739720 | 8.6425128606  | 0.0218178152  |
| H96  | -0.4764489745 | 9.0822251827  | 0.9649870557  |

Product structure of 6-coordinate [Fe<sup>V</sup>(bda)(py)<sub>2</sub>-O]<sup>+</sup> dimer (O-O distance 1.3 Å)

E (B3LYP-D3/LACV3P<sup>\*\*\*</sup>) (a.u.) = -3132.861525

XYZ coordinate

|      |                  |                  |                  |
|------|------------------|------------------|------------------|
| O1   | -3.8006154841449 | 10.9199682547253 | 2.5756870544181  |
| Fe2  | -1.9688740520031 | 10.3266696646148 | 2.3691212534541  |
| C3   | 2.5284191806907  | 9.3559369890970  | 1.9563158275759  |
| C4   | 2.1041746821503  | 10.5748775052052 | 2.5009450867687  |
| C5   | 0.7372527995102  | 10.8047110308542 | 2.5749622032319  |
| N6   | -0.1314494377350 | 9.8769428159935  | 2.1585870266502  |
| C7   | 0.2343464934013  | 8.7116200270699  | 1.6103541068247  |
| C8   | 1.5984998516882  | 8.4199186518347  | 1.4947550253469  |
| H9   | 3.5888293164715  | 9.1380470284475  | 1.8772516784840  |
| H10  | 2.7944486866107  | 11.3369589824172 | 2.8454616015508  |
| H11  | 1.9323313418905  | 7.4858661546833  | 1.0576938063152  |
| C12  | -3.2127816424085 | 6.4967403390677  | 0.6096021503272  |
| C13  | -0.9224350922505 | 7.8896538782810  | 1.2113691222363  |
| N14  | -2.1369144021520 | 8.4091519956282  | 1.5772776219232  |
| C15  | -3.2497629663073 | 7.7069879275387  | 1.3130735724417  |
| H16  | -4.1483684995171 | 5.9974124890828  | 0.3856890612948  |
| C17  | 0.0362565314516  | 12.0756463178487 | 3.0019619326499  |
| O18  | 0.6262525214647  | 13.0526800859851 | 3.4120397708082  |
| C19  | -4.6121573345909 | 8.2197871977579  | 1.7827988862771  |
| O20  | -5.4731638435726 | 8.3877596142900  | 0.9126225906240  |
| O21  | -1.2759543165181 | 12.0066948380460 | 2.8024155609526  |
| O22  | -4.6765050252685 | 8.3860360424650  | 3.0426303087508  |
| N23  | -1.9244932785432 | 9.6861314426253  | 4.2570839975146  |
| C24  | -2.0272197901646 | 10.6070144404588 | 5.2346740795221  |
| C25  | -2.1312556374310 | 10.2536437280152 | 6.5761845104743  |
| H26  | -2.0354382824997 | 11.6432647897035 | 4.9362890642549  |
| H27  | -2.2252692259166 | 11.0503078653005 | 7.3037030568753  |
| N28  | -2.1902283037608 | 10.9809728001101 | 0.4476277063559  |
| C29  | -1.2269736850446 | 11.7131965318939 | -0.1519615342943 |
| C30  | -1.3947345368944 | 12.2641918784558 | -1.4134711813183 |
| H31  | -0.3101014303012 | 11.8640592043841 | 0.3997212303168  |
| H32  | -0.5890125417867 | 12.8403169621638 | -1.8559969360945 |
| C33  | -1.9867863308926 | 5.9771655566074  | 0.2184610835439  |
| H34  | -1.9311106193423 | 5.0379489622800  | -0.3229770098606 |
| C35  | -0.8206498538438 | 6.6769586334252  | 0.5394082201538  |
| H36  | 0.1510779489777  | 6.2853726604100  | 0.2616829385292  |
| C37  | -2.1297019426896 | 8.9053310310656  | 6.9222700200572  |
| H38  | -2.2099529408012 | 8.5986860617823  | 7.9605246644352  |
| C39  | -2.0299814505260 | 7.9521021003605  | 5.9069772956001  |
| H40  | -2.0332175010070 | 6.8893522594975  | 6.1244805370376  |
| C41  | -1.9323939778180 | 8.3755925427276  | 4.5893311623962  |
| H42  | -1.8636992591586 | 7.6652870165919  | 3.7800867253789  |
| C43  | -2.6083286902849 | 12.0740700302756 | -2.0801634425304 |
| H44  | -2.7723331617665 | 12.5072485119394 | -3.0622871130218 |
| C45  | -3.6033654013797 | 11.3250809675489 | -1.4597140583664 |
| H46  | -4.5814702332363 | 11.1812980321837 | -1.9045987776990 |
| C47  | -3.3556320725635 | 10.7881034385274 | -0.2008313404004 |
| H48  | -4.1150208097699 | 10.2085984779823 | 0.3005527919938  |
| O49  | -3.8882868398427 | 12.0244943124943 | 3.2556397063002  |
| Fe50 | -5.3970758865953 | 13.0712116303124 | 2.8416207735868  |
| C51  | -8.9907281082416 | 15.5535147008505 | 1.2965756603785  |
| C52  | -8.4114923166021 | 14.5573886135474 | 0.4995214910883  |
| C53  | -7.3216262384332 | 13.8706877319716 | 1.0176927419780  |
| N54  | -6.8681255133199 | 14.1447524602728 | 2.2458564272936  |

C55 -7.3793253497403 15.1055805830584 3.0269926503488  
C56 -8.4721572621074 15.8451413697690 2.5620038475567  
H57 -9.8422667149891 16.1161357437981 0.9266701664856  
H58 -8.7689729345627 14.3195370034298 -0.4962746101137  
H59 -8.9137316239320 16.6274612511843 3.1687948403067  
C60 -5.2375426776467 15.2084151964760 6.6585195462090  
C61 -6.6692089201661 15.2159441180582 4.3135166198457  
N62 -5.7393060553072 14.2363241661659 4.5247327162936  
C63 -5.0723060804784 14.2108242631504 5.6909347191433  
H64 -4.6410556190360 15.1584706128018 7.5624076375768  
C65 -6.4580309980842 12.8433603764572 0.3125270028390  
O66 -6.6958382145855 12.4558866706454 -0.8141677740333  
C67 -4.1514623391158 13.0416123014007 5.9961417186974  
O68 -2.9838512214357 13.2914708165634 6.3311997059243  
O69 -5.4161515810012 12.4851133011133 1.0439959947261  
O70 -4.6810975309570 11.8892730495451 5.8992992590774  
N71 -6.6144927040078 11.5926880784105 3.4253274651166  
C72 -6.7056145640869 10.4798440836080 2.6772969610529  
C73 -7.3780724543917 9.3370300902805 3.1196113125450  
H74 -6.2230472383861 10.4924495371496 1.7130575031064  
H75 -7.4167155552834 8.4835695215843 2.4550650022518  
N76 -4.000601837619 14.4715141582283 2.3433481053918  
C77 -4.1043396379405 15.1977288119189 1.2116253412299  
C78 -3.1042771953154 16.0649807732769 0.7955860857776  
H79 -5.0057053306864 15.0698306048415 0.6286807225900  
H80 -3.2367805942295 16.6338600082162 -0.1182556662173  
C81 -6.1646136446873 16.2197013746595 6.4386217537158  
H82 -6.3202230659213 16.9992894973247 7.1778160646196  
C83 -6.9076005199664 16.2117345415552 5.2559837810909  
H84 -7.6528028986549 16.9761835884951 5.0670691899379  
C85 -7.9697826846892 9.3440065673150 4.3826427179267  
H86 -8.4981529685604 8.4708230682627 4.7521210799205  
C87 -7.8701105874096 10.4957982933490 5.1578956261776  
H88 -8.3115225059386 10.5553965918947 6.1467844873430  
C89 -7.1897672523049 11.6006340233905 4.6511004124775  
H90 -7.1165234713545 12.5124083103674 5.2198453172237  
C91 -1.9409092515528 16.1740919807064 1.5608562285533  
H92 -1.1373122664551 16.8353103507325 1.2515380578894  
C93 -1.8291479038186 15.4166947589806 2.7236315800076  
H94 -0.9358658277498 15.4295628593031 3.3377058822206  
C95 -2.8812019320339 14.5842684967823 3.0877256087316  
H96 -2.8152494586172 13.9827812965973 3.9822043210383
